# Supplementary material for: An Asymmetric Dinuclear Bis(ansa-Zirconocene) Complex: Synthesis and Performance in Olefin (co-)Polymerization
Source: MDPI journal article supplement (doi:10.3390/catal13071108), 2023-07-15
Supplement: s1 [file s1]

## Supporting Information

# An Asymmetric Dinuclear Bis(*ansa*-Zirconocene) Complex: Synthesis and Performance in Olefin (co-)Polymerization

Lars N. Jende,<sup>a</sup> Thierry Roisnel,<sup>b</sup> Virginie Cirriez,<sup>c</sup> Alexandre Welle,<sup>c</sup> Evgueni Kirillov,<sup>a,\*</sup> and Jean-François Carpentier<sup>a,\*</sup>

<sup>a</sup> Univ Rennes, CNRS, ISCR, UMR 6226, F-35700 Rennes, France

<sup>b</sup> Centre de diffraction X, Univ Rennes, CNRS, ISCR, UMR 6226, F-35700 Rennes, France

<sup>c</sup> TotalEnergies, Zone Industrielle Feluy C, B-7181 Seneffe, Belgium

|                                                                                                                                                  |    |
|--------------------------------------------------------------------------------------------------------------------------------------------------|----|
| Figure S1: <sup>1</sup> H NMR spectrum (CDCl <sub>3</sub> , 400 MHz, 25 °C) of <b>1</b> .....                                                    | 3  |
| Figure S2: <sup>13</sup> C{ <sup>1</sup> H} NMR spectrum (CDCl <sub>3</sub> , 100 MHz, 25 °C) of <b>1</b> .....                                  | 3  |
| Figure S3: <sup>1</sup> H NMR spectrum (CDCl <sub>3</sub> , 400 MHz, 25 °C) of <b>2</b> .....                                                    | 4  |
| Figure S4: <sup>1</sup> H NMR spectrum (CDCl <sub>3</sub> , 400 MHz, 25 °C) of <b>4</b> .....                                                    | 5  |
| Figure S5: <sup>13</sup> C{ <sup>1</sup> H} NMR spectrum (CDCl <sub>3</sub> , 100 MHz, 25 °C) of <b>4</b> .....                                  | 5  |
| Figure S6: <sup>1</sup> H- <sup>13</sup> C HSQC NMR spectrum (CDCl <sub>3</sub> , 400 MHz, 25 °C) of <b>4</b> .....                              | 5  |
| Figure S7: <sup>1</sup> H NMR spectrum (C <sub>6</sub> D <sub>6</sub> , 400 MHz, 25 °C) of <b>5</b> .....                                        | 6  |
| Figure S8: <sup>13</sup> C{ <sup>1</sup> H} NMR spectrum (C <sub>6</sub> D <sub>6</sub> , 100 MHz, 25 °C) of <b>5</b> .....                      | 6  |
| Figure S9: <sup>1</sup> H- <sup>13</sup> C HSQC NMR spectrum (C <sub>6</sub> D <sub>6</sub> , 400 MHz, 25 °C) of <b>5</b> .....                  | 6  |
| Figure S10: <sup>1</sup> H NMR spectrum (CDCl <sub>3</sub> , 400 MHz, 25 °C) of <b>6</b> .....                                                   | 7  |
| Figure S11: <sup>13</sup> C{ <sup>1</sup> H} NMR spectrum (CDCl <sub>3</sub> , 100 MHz, 25 °C) of <b>6</b> .....                                 | 7  |
| Figure S12: Selected regions of the <sup>13</sup> C{ <sup>1</sup> H} NMR spectrum (CD <sub>2</sub> Cl <sub>2</sub> , 100 MHz, 25 °C) of <b>6</b> |    |
| Figure S13: <sup>1</sup> H- <sup>13</sup> C HSQC spectrum (CD <sub>2</sub> Cl <sub>2</sub> , 400 MHz, 25 °C) of <b>6</b> .....                   | 9  |
| Figure S14: <sup>1</sup> H- <sup>13</sup> C HMBC NMR spectrum (CD <sub>2</sub> Cl <sub>2</sub> , 400 MHz, 25 °C) of <b>6</b> .....               | 9  |
| Figure S15: <sup>1</sup> H NMR spectrum (CDCl <sub>3</sub> , 400 MHz, 25 °C) of <b>7</b> .....                                                   | 10 |
| Figure S16: <sup>13</sup> C{ <sup>1</sup> H} NMR spectrum (CDCl <sub>3</sub> , 100 MHz, 25 °C) of <b>7</b> .....                                 | 10 |
| Figure S17: <sup>1</sup> H- <sup>13</sup> C HSQC NMR spectrum (CDCl <sub>3</sub> , 400 MHz, 25 °C) of <b>7</b> .....                             | 10 |
| Figure S18: <sup>1</sup> H NMR spectrum (CD <sub>2</sub> Cl <sub>2</sub> , 400 MHz, 25 °C) of <b>8</b> .....                                     | 11 |
| Figure S19: <sup>13</sup> C{ <sup>1</sup> H} NMR spectrum (CD <sub>2</sub> Cl <sub>2</sub> , 100 MHz, 25 °C) of <b>8</b> .....                   | 11 |
| Figure S20: <sup>1</sup> H- <sup>13</sup> C HSQC NMR (CD <sub>2</sub> Cl <sub>2</sub> , 400 MHz, 25 °C) of <b>8</b> .....                        | 11 |
| Figure S21: <sup>1</sup> H- <sup>13</sup> C HMBC NMR spectrum (CD <sub>2</sub> Cl <sub>2</sub> , 400 MHz, 25 °C) of <b>8</b> .....               | 12 |
| Figure S22: <sup>1</sup> H NMR spectrum (CD <sub>2</sub> Cl <sub>2</sub> , 400 MHz, 25 °C) of <b>9</b> .....                                     | 13 |
| Figure S23: <sup>13</sup> C{ <sup>1</sup> H} NMR spectrum (CD <sub>2</sub> Cl <sub>2</sub> , 100 MHz, 25 °C) of <b>9</b> .....                   | 13 |
| Figure S24: <sup>1</sup> H- <sup>13</sup> C HSQC NMR spectrum (CD <sub>2</sub> Cl <sub>2</sub> , 400 MHz, 25 °C) of <b>9</b> .....               | 14 |
| Figure S25: <sup>1</sup> H- <sup>13</sup> C HBC NMR spectrum (CD <sub>2</sub> Cl <sub>2</sub> , 400 MHz, 25 °C) of <b>9</b> .....                | 14 |

|                                                                                                                                                                                                                                                                                     |    |
|-------------------------------------------------------------------------------------------------------------------------------------------------------------------------------------------------------------------------------------------------------------------------------------|----|
| Figure S26: Detail of the $^1\text{H}$ - $^1\text{H}$ COSY NMR spectrum ( $\text{CD}_2\text{Cl}_2$ , 400 MHz, 25 °C) of <b>9</b> .....                                                                                                                                              | 15 |
| Figure S27: Detail of the $^1\text{H}$ - $^1\text{H}$ COSY NMR spectrum ( $\text{CD}_2\text{Cl}_2$ , 400 MHz, 25 °C) of <b>9</b> .....                                                                                                                                              | 15 |
| Figure S28: ASAP mass spectrum (300 °C) of <b>9</b> .....                                                                                                                                                                                                                           | 16 |
| Figure S29: MALDI-TOF mass spectrum (DCTB-Matrix) of <b>9</b> .....                                                                                                                                                                                                                 | 16 |
| Table S1: Crystallographic Data for Compounds <b>5</b> , <b>6</b> , and <b>7</b> .....                                                                                                                                                                                              | 16 |
| Figure S30: $^{13}\text{C}\{^1\text{H}\}$ NMR spectra (1,2,5-trichlorobenzene/ $\text{C}_6\text{D}_6$ , 125 MHz, 135 °C) of ethylene/1-hexene copolymers prepared with complex <b>9</b> and corresponding composition determined thereof (Table 3, entries 11 and 12).              |    |
| Figure S31: $^{13}\text{C}\{^1\text{H}\}$ NMR spectra (1,2,5-trichlorobenzene/ $\text{C}_6\text{D}_6$ , 125 MHz, 135 °C) of ethylene/1-hexene copolymers prepared with complexes <b>9</b> and <b>M</b> , and corresponding composition determined thereof (Table 3, entries 13–15). |    |
| Figure S32: SEC trace of a PP prepared with complex <b>9</b> (Table 2, entry 6).                                                                                                                                                                                                    |    |
| Figure S33: SEC trace of a poly(ethylene- <i>co</i> -1-hexene) prepared with complex <b>9</b> (Table 3, entry 11).                                                                                                                                                                  |    |
| Figure S34: SEC trace of a poly(ethylene- <i>co</i> -1-hexene) prepared with complex <b>9</b> (Table 3, entry 12).                                                                                                                                                                  |    |
| Figure S35: SEC trace of a poly(ethylene- <i>co</i> -1-hexene) prepared with complex <b>9</b> (Table 3, entry 13).                                                                                                                                                                  |    |
| Figure S36: SEC trace of a poly(ethylene- <i>co</i> -1-hexene) prepared with complex <b>M</b> (Table 3, entry 14).                                                                                                                                                                  |    |
| Figure S37: SEC trace of a poly(ethylene- <i>co</i> -1-hexene) prepared with complex <b>M</b> (Table 3, entry 15).                                                                                                                                                                  |    |
| Figure S38: DSC trace of a polypropylene prepared with complex <b>9</b> (Table 2, entry 6).                                                                                                                                                                                         |    |
| Figure S39: DSC trace of a polypropylene prepared with complex <b>9</b> (Table 2, entry 7).                                                                                                                                                                                         |    |
| Figure S40: DSC trace of a polypropylene prepared with complex <b>9</b> (Table 2, entry 8).                                                                                                                                                                                         |    |
| Figure S41: DSC trace of a polypropylene prepared with complex <b>M</b> (Table 2, entry 9).                                                                                                                                                                                         |    |
| Figure S42: DSC trace of a polypropylene prepared with complex <b>M</b> (Table 2, entry 10).                                                                                                                                                                                        |    |
| Figure S43: DSC trace of a poly(ethylene- <i>co</i> -1-hexene) prepared with complex <b>9</b> (Table 3, entry 11).                                                                                                                                                                  |    |
| Figure S44: DSC trace of a poly(ethylene- <i>co</i> -1-hexene) prepared with complex <b>9</b> (Table 3, entry 12).                                                                                                                                                                  |    |
| Figure S45: DSC trace of a poly(ethylene- <i>co</i> -1-hexene) prepared with complex <b>9</b> (Table 3, entry 13).                                                                                                                                                                  |    |
| Figure S46: DSC trace of a poly(ethylene- <i>co</i> -1-hexene) prepared with complex <b>M</b> (Table 3, entry 14).                                                                                                                                                                  |    |
| Figure S47: DSC trace of a poly(ethylene- <i>co</i> -1-hexene) prepared with complex <b>M</b> (Table 3, entry 15).                                                                                                                                                                  |    |

1:

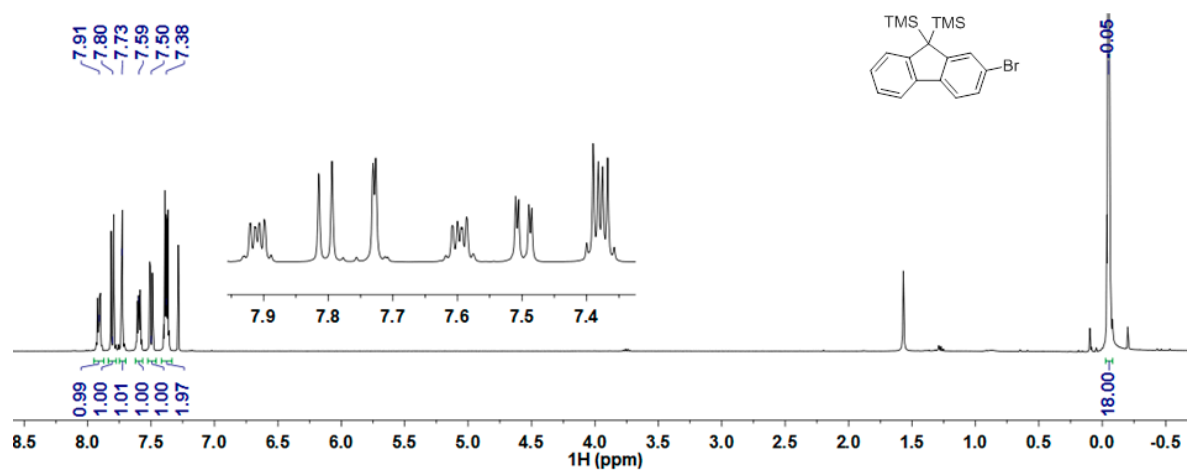

Figure S1: <sup>1</sup>H NMR spectrum (CDCl<sub>3</sub>, 400 MHz, 25 °C) of **1**

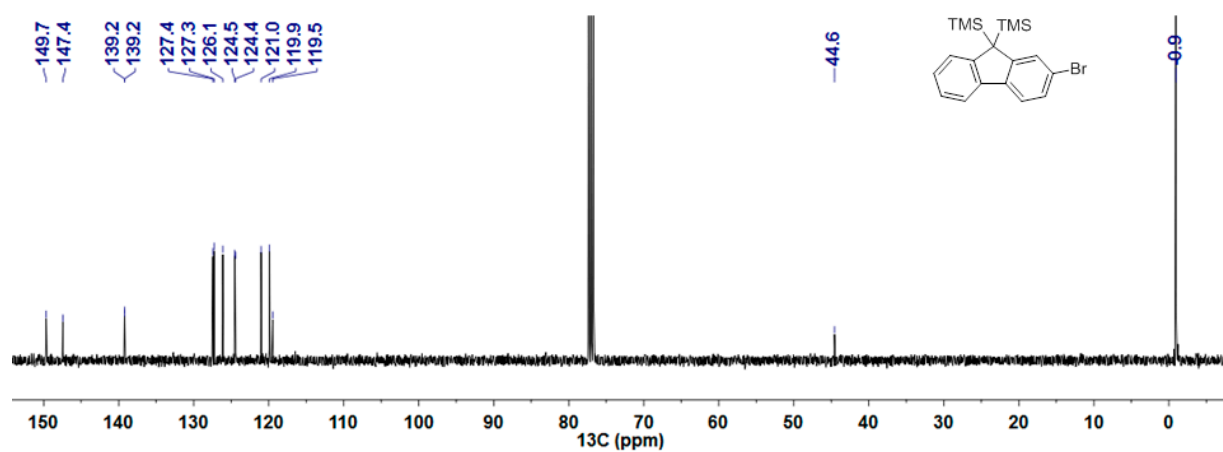

Figure S2: <sup>13</sup>C{<sup>1</sup>H} NMR spectrum (CDCl<sub>3</sub>, 100 MHz, 25 °C) of **1**

2:

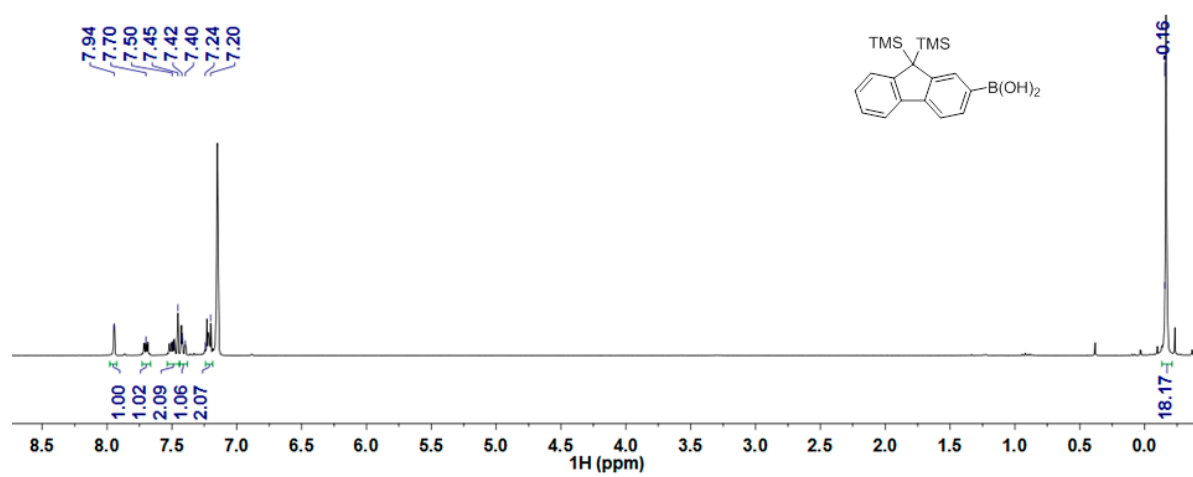

**Figure S3:**  $^1\text{H}$  NMR spectrum ( $\text{CDCl}_3$ , 400 MHz, 25 °C) of **2**

4:

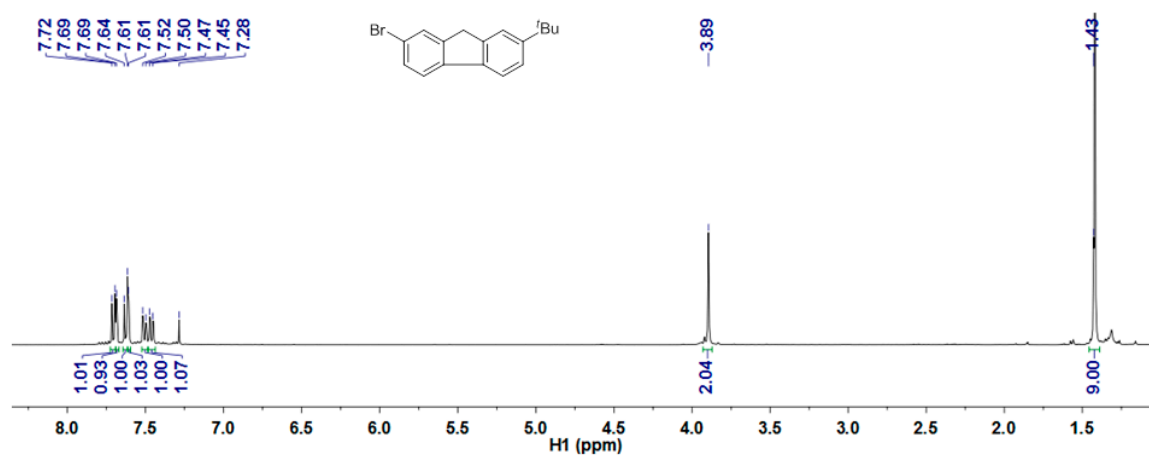

Figure S4: <sup>1</sup>H NMR spectrum (CDCl<sub>3</sub>, 400 MHz, 25 °C) of 4

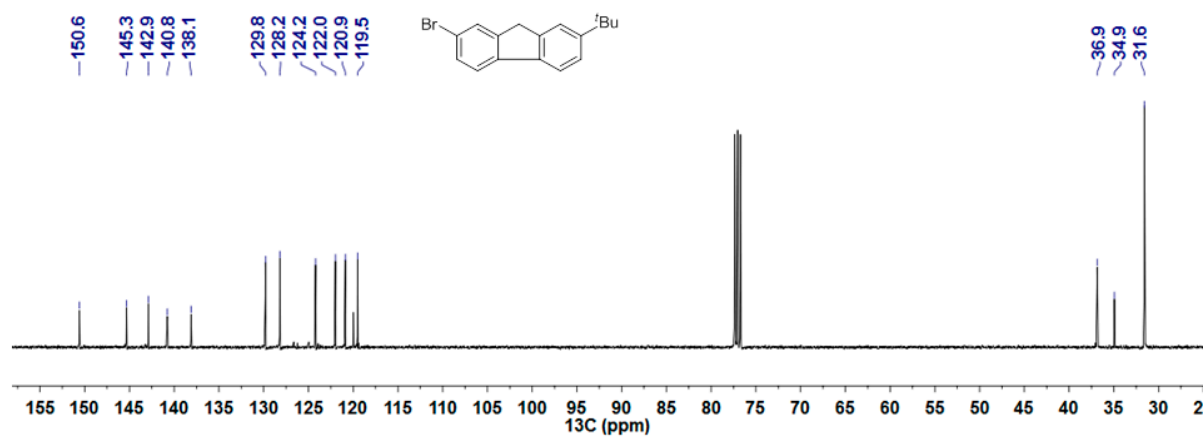

Figure S5: <sup>13</sup>C{<sup>1</sup>H} NMR spectrum (CDCl<sub>3</sub>, 100 MHz, 25 °C) of 4

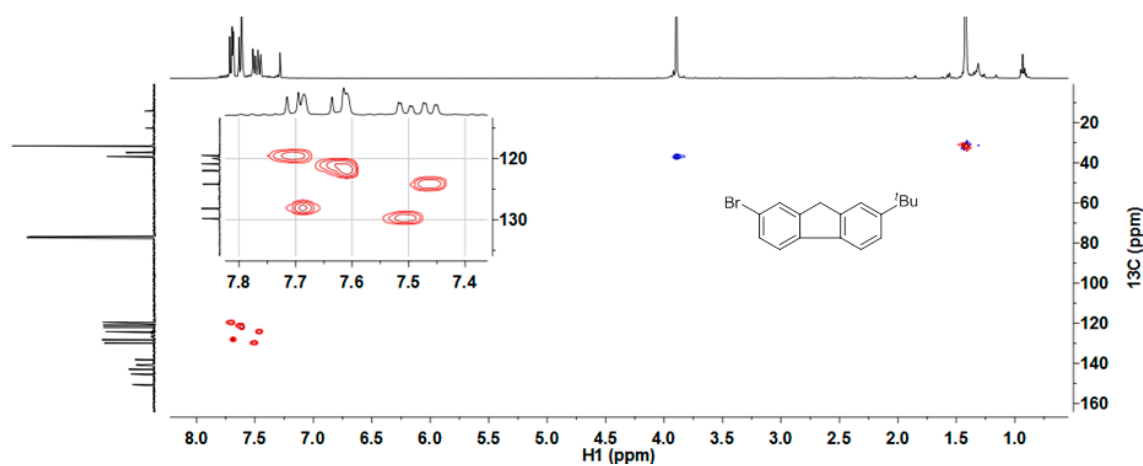

Figure S6: <sup>1</sup>H-<sup>13</sup>C HSQC NMR spectrum (CDCl<sub>3</sub>, 400 MHz, 25 °C) of 4

5:

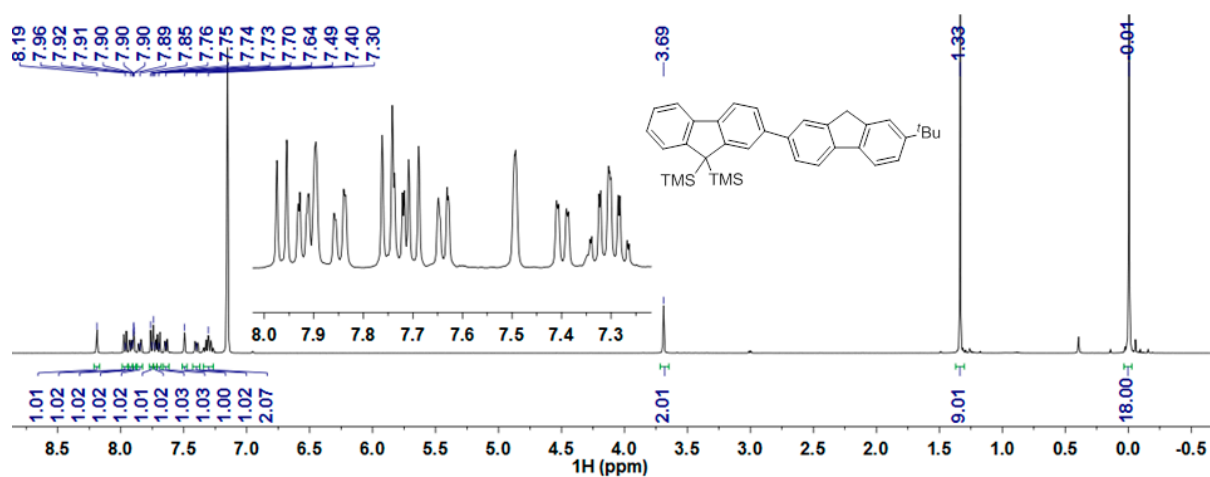

Figure S7: <sup>1</sup>H NMR spectrum (C<sub>6</sub>D<sub>6</sub>, 400 MHz, 25 °C) of **5**

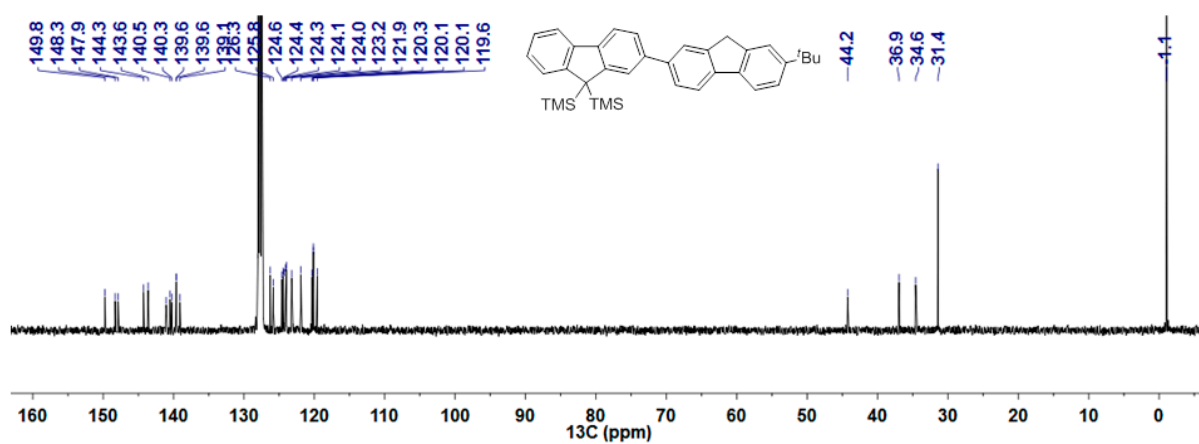

Figure S8: <sup>13</sup>C{<sup>1</sup>H} NMR spectrum (C<sub>6</sub>D<sub>6</sub>, 100 MHz, 25 °C) of **5**

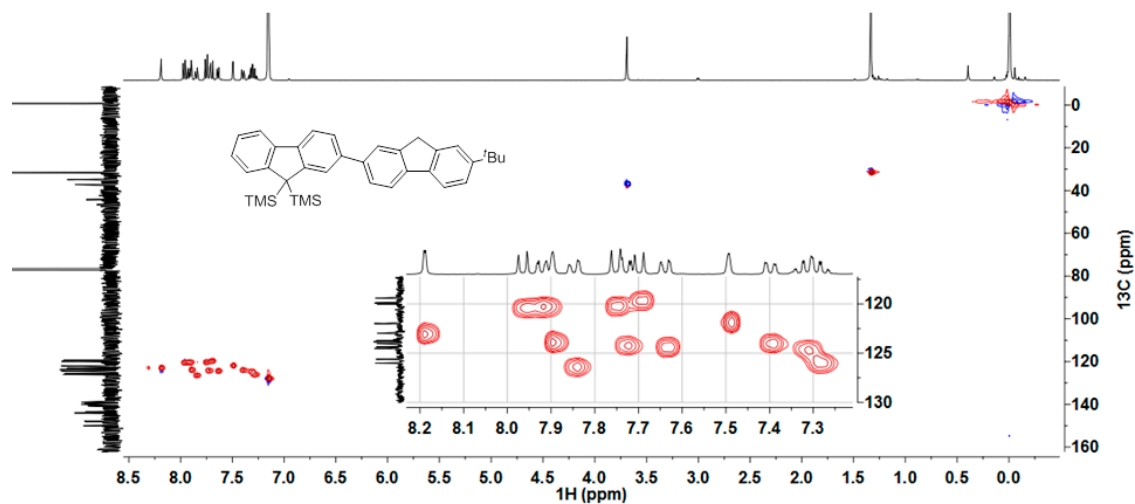

Figure S9: <sup>1</sup>H-<sup>13</sup>C HSQC NMR spectrum (C<sub>6</sub>D<sub>6</sub>, 400 MHz, 25 °C) of **5**

Chemical structure of compound 10 is shown above the spectrum. The structure is a fluorene derivative with two TMS groups at positions 9 and 10, and a tert-butyl group at position 1.

<sup>1</sup>H NMR spectrum (CDCl<sub>3</sub>) of compound 10. The x-axis represents the chemical shift in ppm, ranging from -0.5 to 8.5. The spectrum shows several peaks, with integrations provided below the baseline.

Peak list (ppm): 8.05, 8.02, 7.92, 7.83, 7.74, 7.72, 7.70, 7.68, 7.66, 7.45, 7.23, 7.09, 6.93, 6.61, 6.53, 6.23, 6.02, 4.32, 4.28, 3.30, 3.15, 1.37, 1.35, 1.34, 0.99, 0.03, 0.01.

Integration values (from left to right): 1.04, 1.03, 1.04, 1.07, 0.95, 1.13, 0.94, 1.05, 0.93, 3.12, 0.51, 0.99, 0.48, 0.50, 0.51, 0.49, 0.50, 0.51, 0.49, 0.50, 0.51, 1.04, 1.01, 3.05, 9.27, 3.00, 18.43.

Chemical structure of compound 10 is shown above the spectrum. The structure is a dimer of two fluorene units linked by a biphenyl group. One fluorene unit is substituted with a TMS group at the 9-position, and the other is substituted with a t-butyl group at the 9-position.

<sup>13</sup>C NMR spectrum (ppm): 157.9, 155.6, 149.3, 149.2, 148.2, 148.2, 147.9, 146.3, 146.2, 145.5, 145.5, 140.0, 139.3, 139.3, 139.3, 139.2, 139.1, 138.9, 134.3, 133.2, 133.2, 131.1, 126.6, 126.1, 126.1, 125.7, 125.2, 125.0, 124.8, 124.6, 124.4, 124.0, 123.7, 123.6, 123.5, 123.3, 123.0, 119.9, 119.8, 119.8, 119.4, 118.6, 58.0, 55.7, 44.3, 41.1, 40.8, 39.5, 34.7, 34.6, 31.3, 1.1, -1.1.

**Figure S5:**  $^{13}\text{C}\{^1\text{H}\}$  NMR spectrum ( $\text{CDCl}_3$ , 100 MHz, 25 °C) of **6**

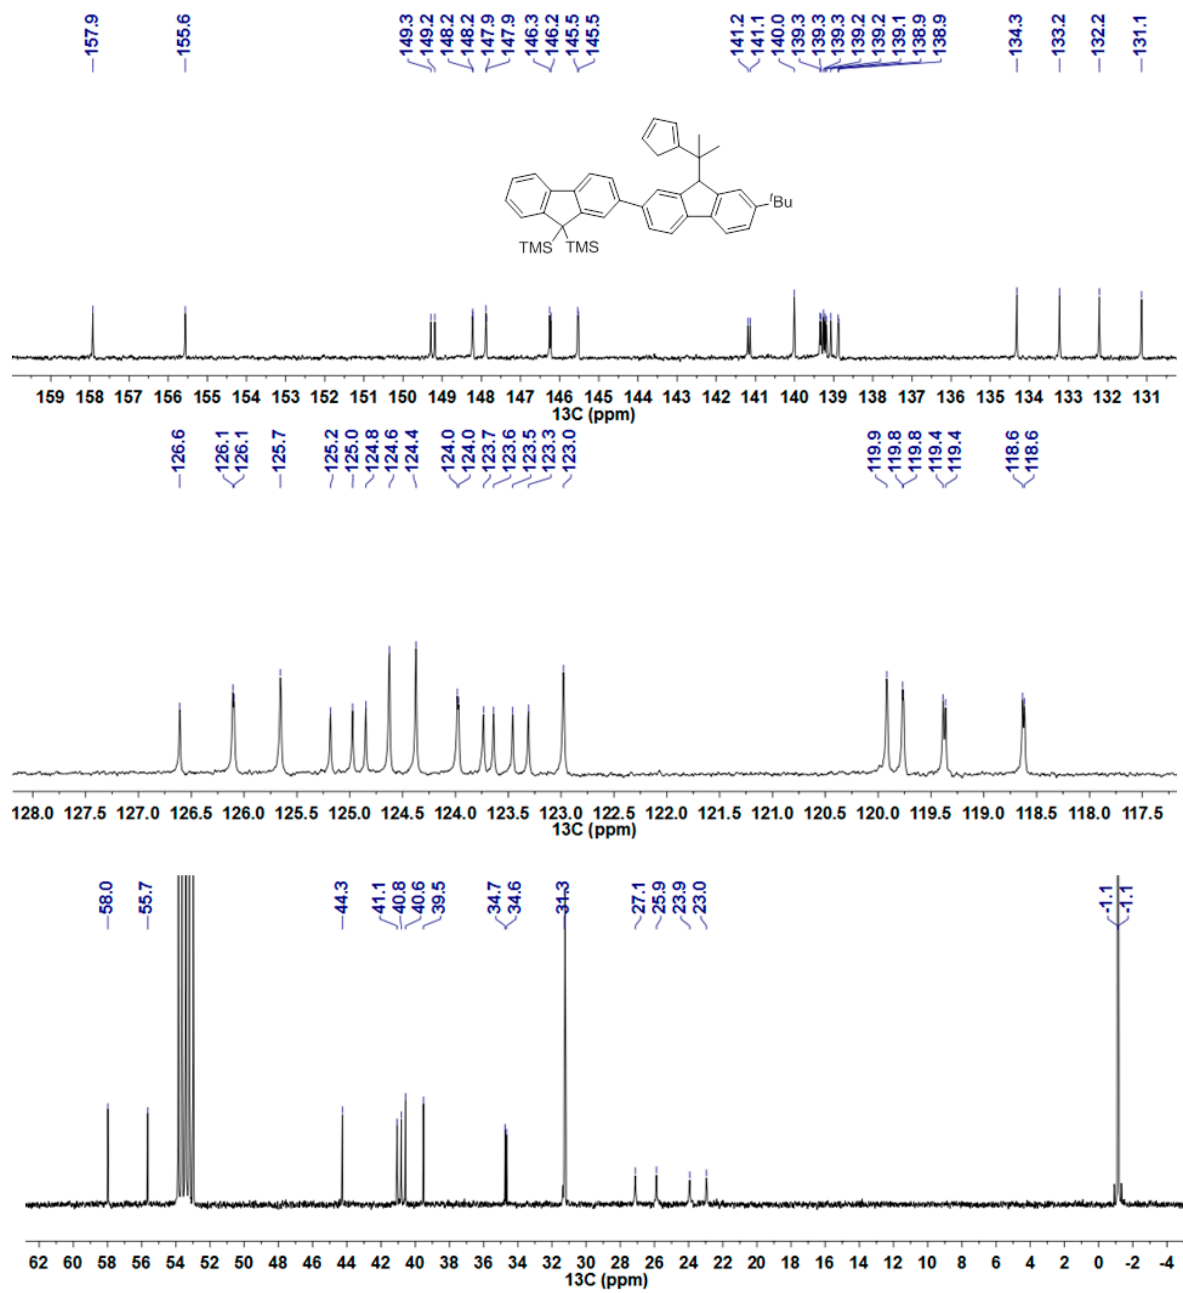

**Figure S6:** Selected regions of the  $^{13}\text{C}\{^1\text{H}\}$  NMR spectrum ( $\text{CD}_2\text{Cl}_2$ , 100 MHz, 25 °C) of **6**



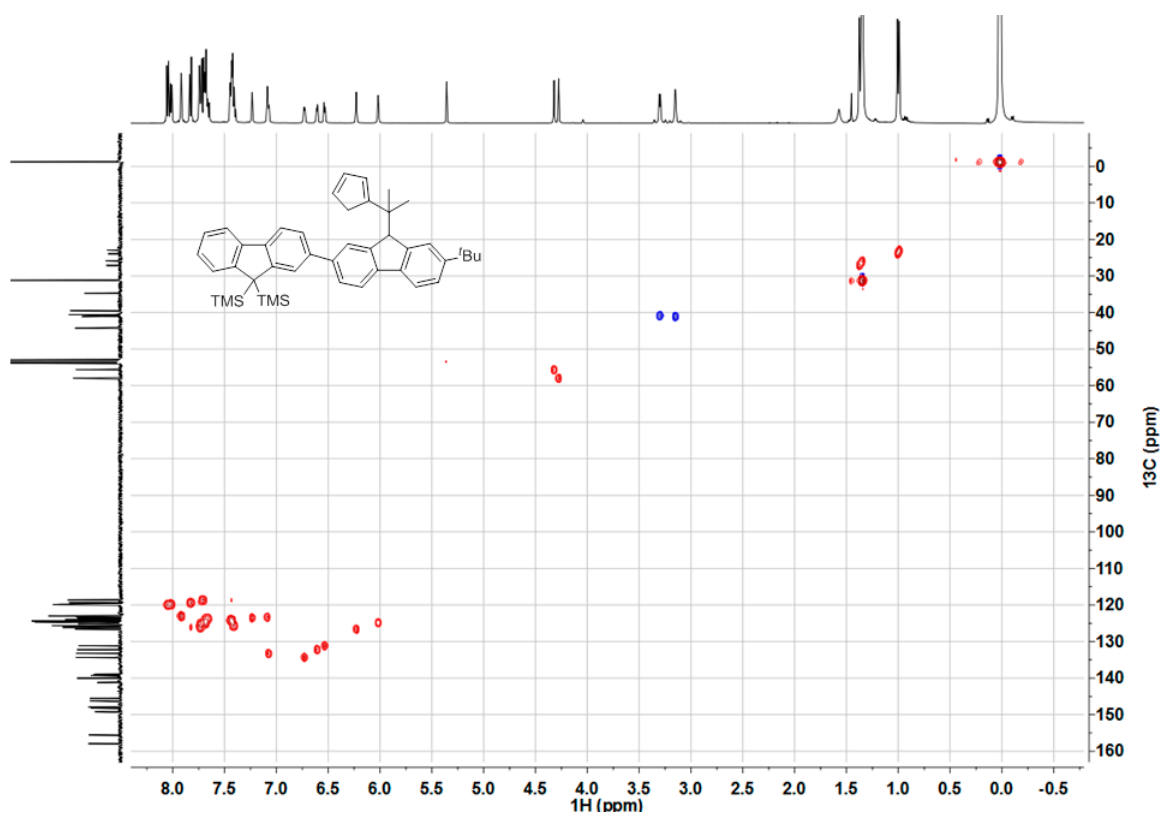

**Figure S7:**  $^1\text{H}$ - $^{13}\text{C}$  HSQC spectrum ( $\text{CD}_2\text{Cl}_2$ , 400 MHz, 25  $^\circ\text{C}$ ) of **6**

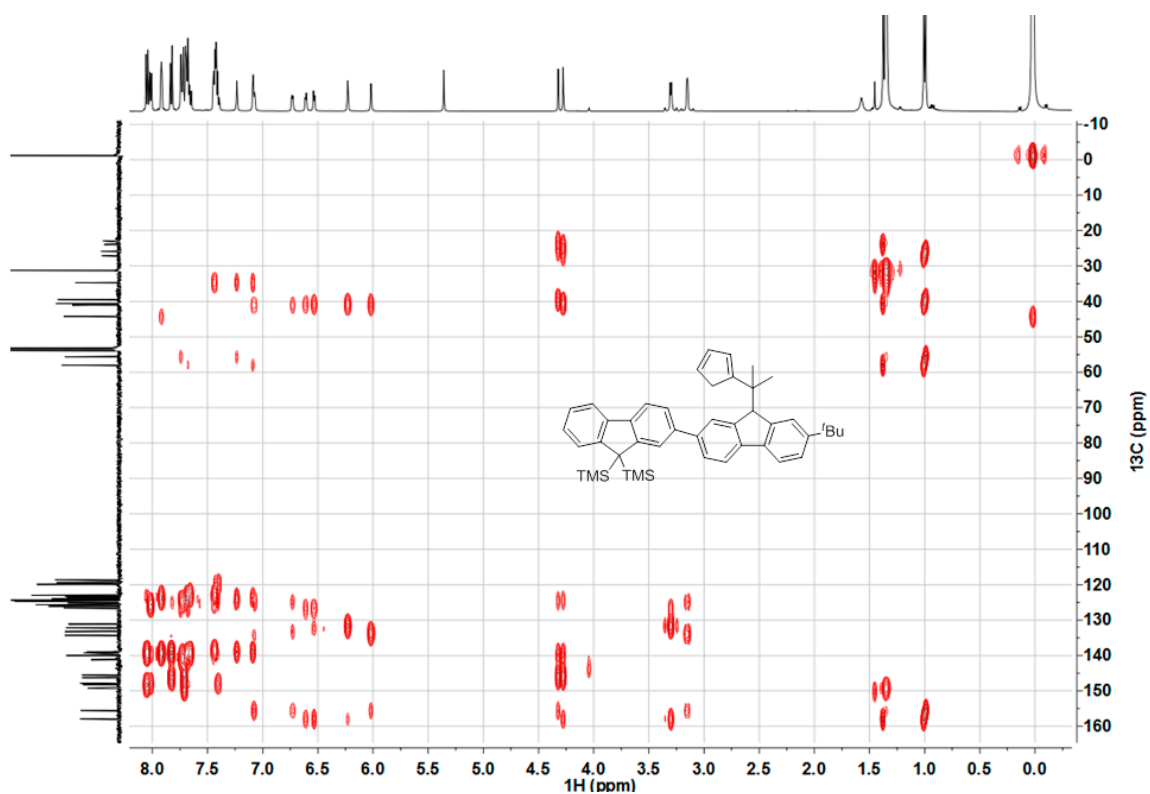

**Figure S8:**  $^1\text{H}$ - $^{13}\text{C}$  HMBC NMR spectrum ( $\text{CD}_2\text{Cl}_2$ , 400 MHz, 25  $^\circ\text{C}$ ) of **6**

7:

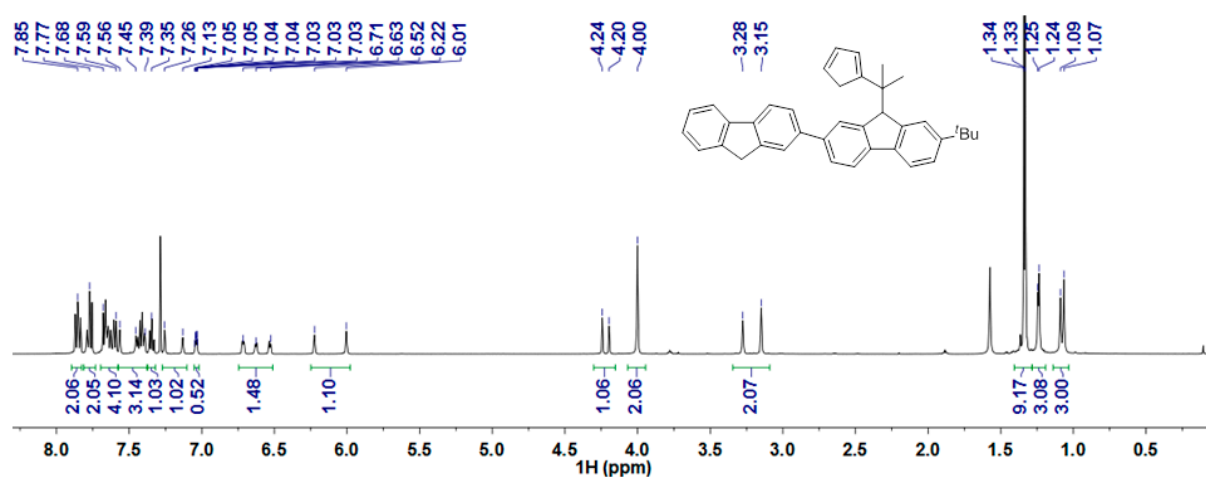

Figure S9: <sup>1</sup>H NMR spectrum (CDCl<sub>3</sub>, 400 MHz, 25 °C) of 7

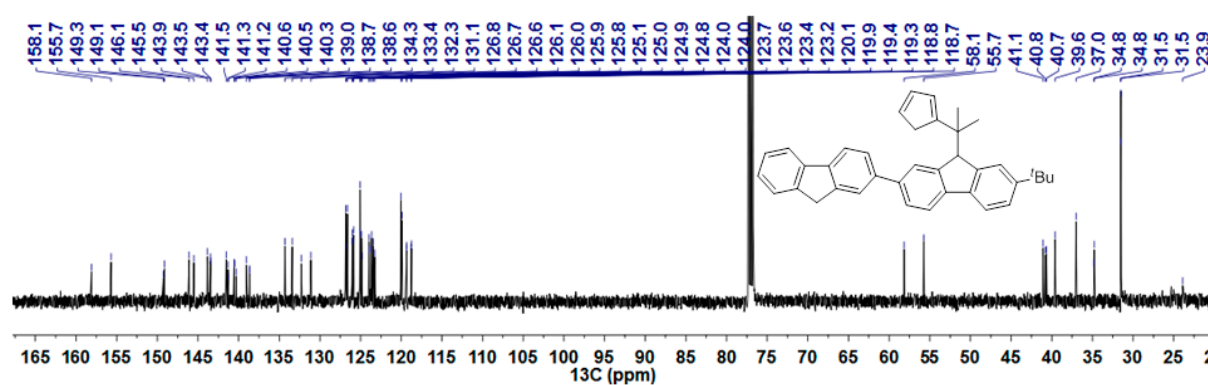

Figure S10: <sup>13</sup>C{<sup>1</sup>H} NMR spectrum (CDCl<sub>3</sub>, 100 MHz, 25 °C) of 7

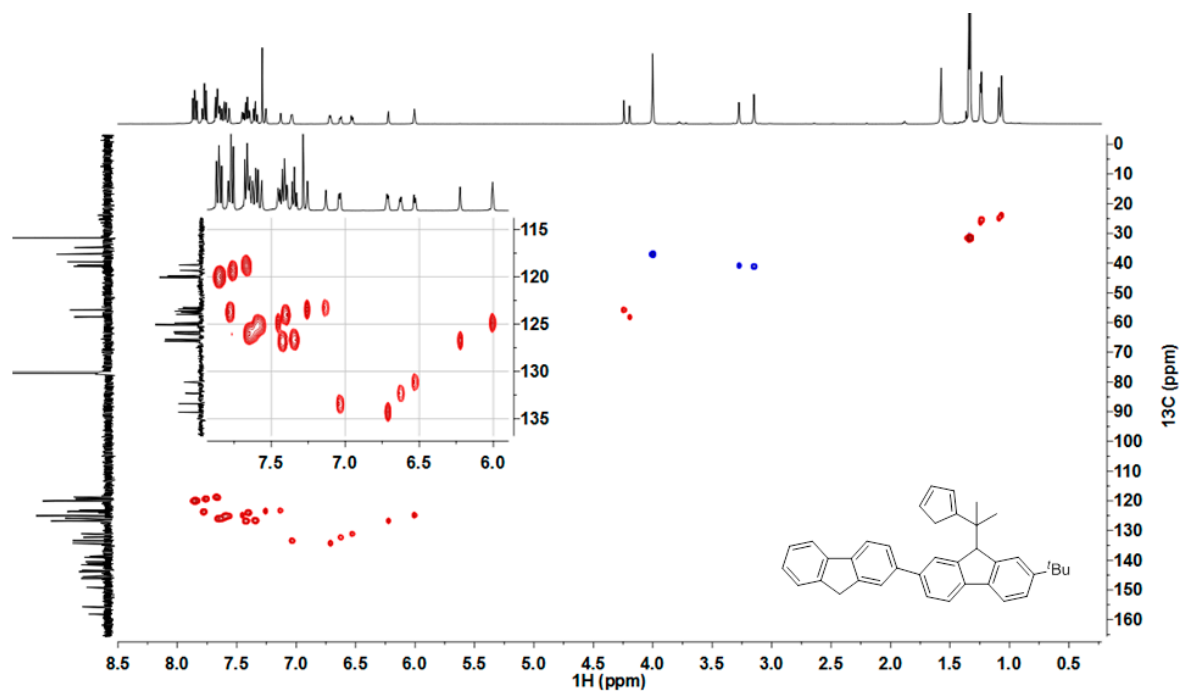

Figure S11: <sup>1</sup>H-<sup>13</sup>C HSQC NMR spectrum (CDCl<sub>3</sub>, 400 MHz, 25 °C) of 7

8:

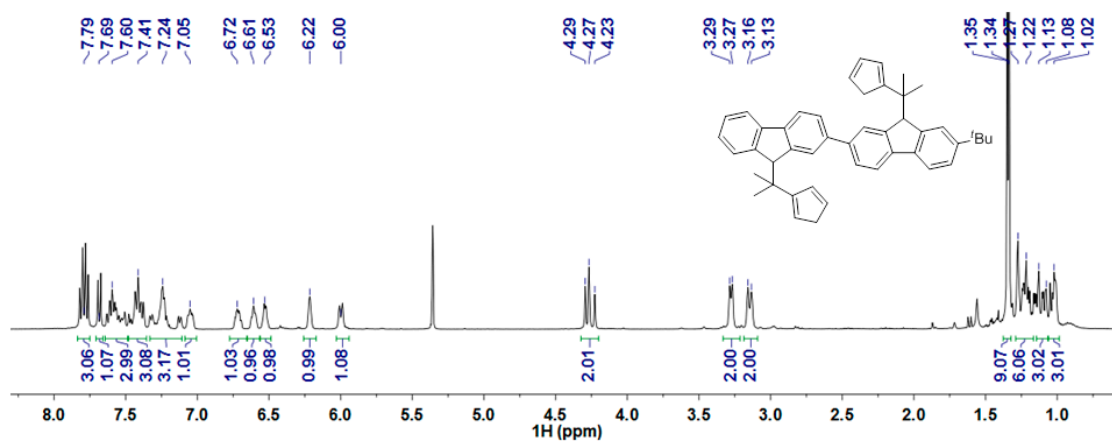

**Figure S12:** <sup>1</sup>H NMR spectrum (CD<sub>2</sub>Cl<sub>2</sub>, 400 MHz, 25 °C) of **8**

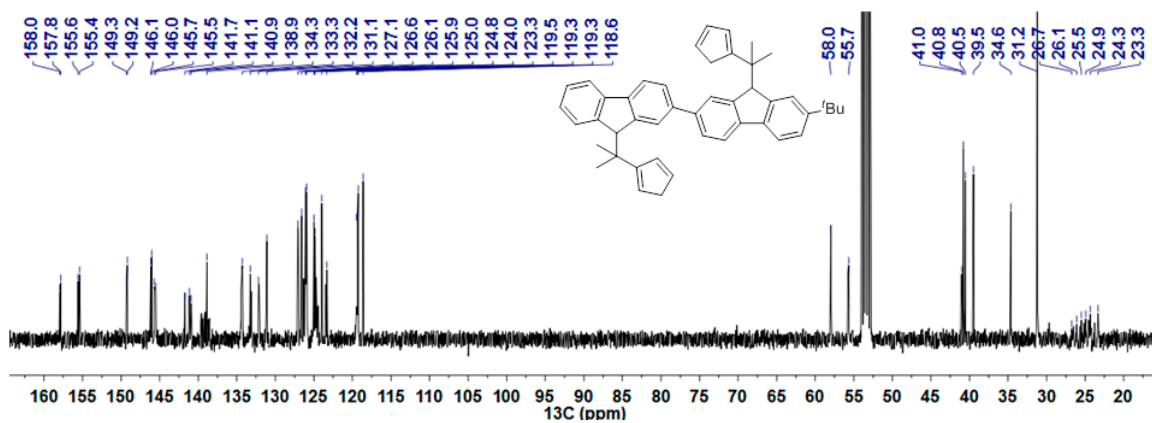

**Figure S19:** <sup>13</sup>C{<sup>1</sup>H} NMR spectrum (CD<sub>2</sub>Cl<sub>2</sub>, 100 MHz, 25 °C) of **8**

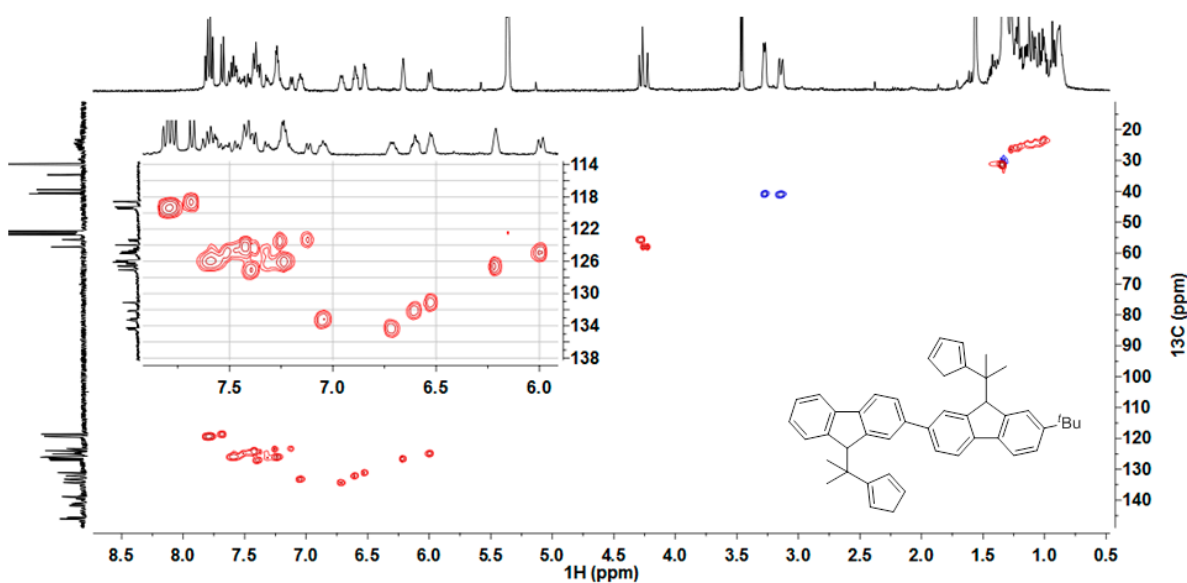

**Figure S13:** <sup>1</sup>H–<sup>13</sup>C HSQC NMR (CD<sub>2</sub>Cl<sub>2</sub>, 400 MHz, 25 °C) of **8**

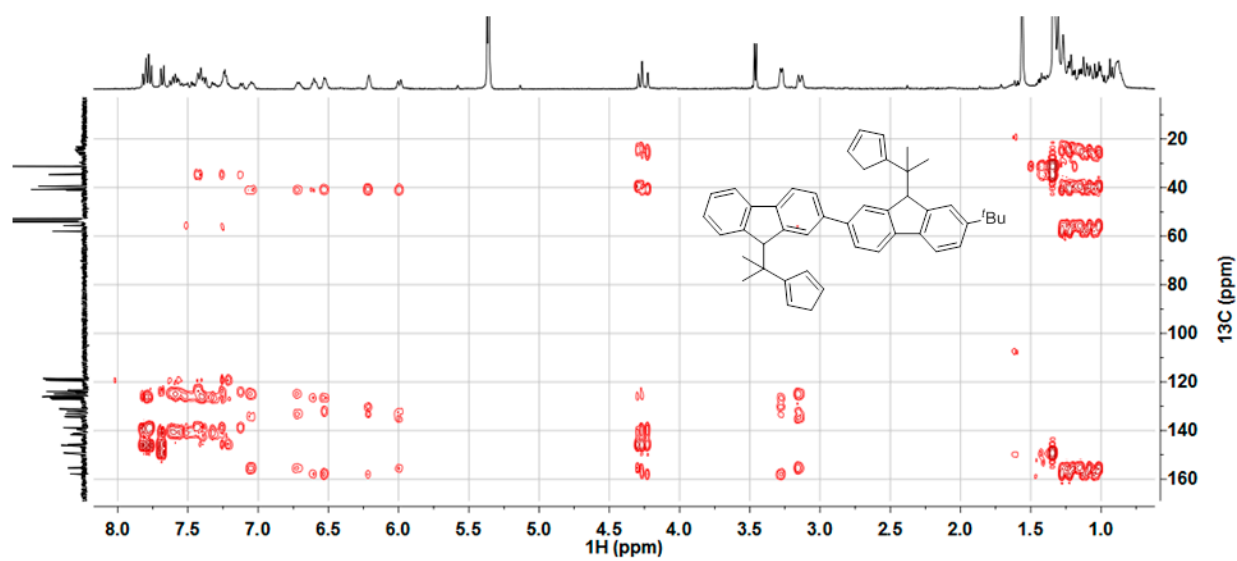

**Figure S14:**  $^1\text{H}$ - $^{13}\text{C}$  HMBC NMR spectrum ( $\text{CD}_2\text{Cl}_2$ , 400 MHz, 25 °C) of **8**

9:

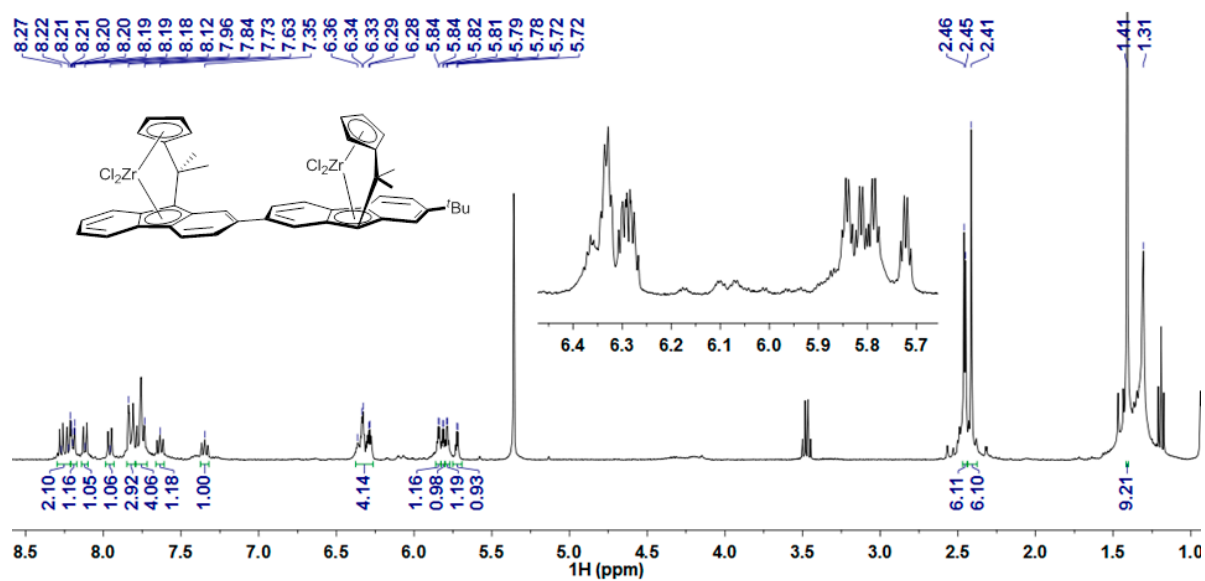

**Figure S15:** <sup>1</sup>H NMR spectrum (CD<sub>2</sub>Cl<sub>2</sub>, 400 MHz, 25 °C) of 9

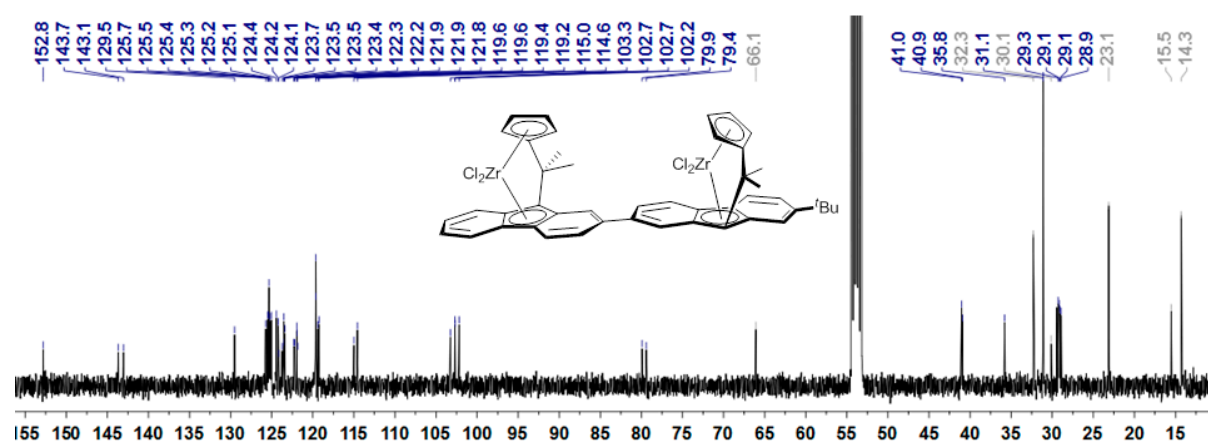

**Figure S16:** <sup>13</sup>C{<sup>1</sup>H} NMR spectrum (CD<sub>2</sub>Cl<sub>2</sub>, 100 MHz, 25 °C) of 9 (labels in light grey stand for signals of residual diethyl ether and *n*-hexane)

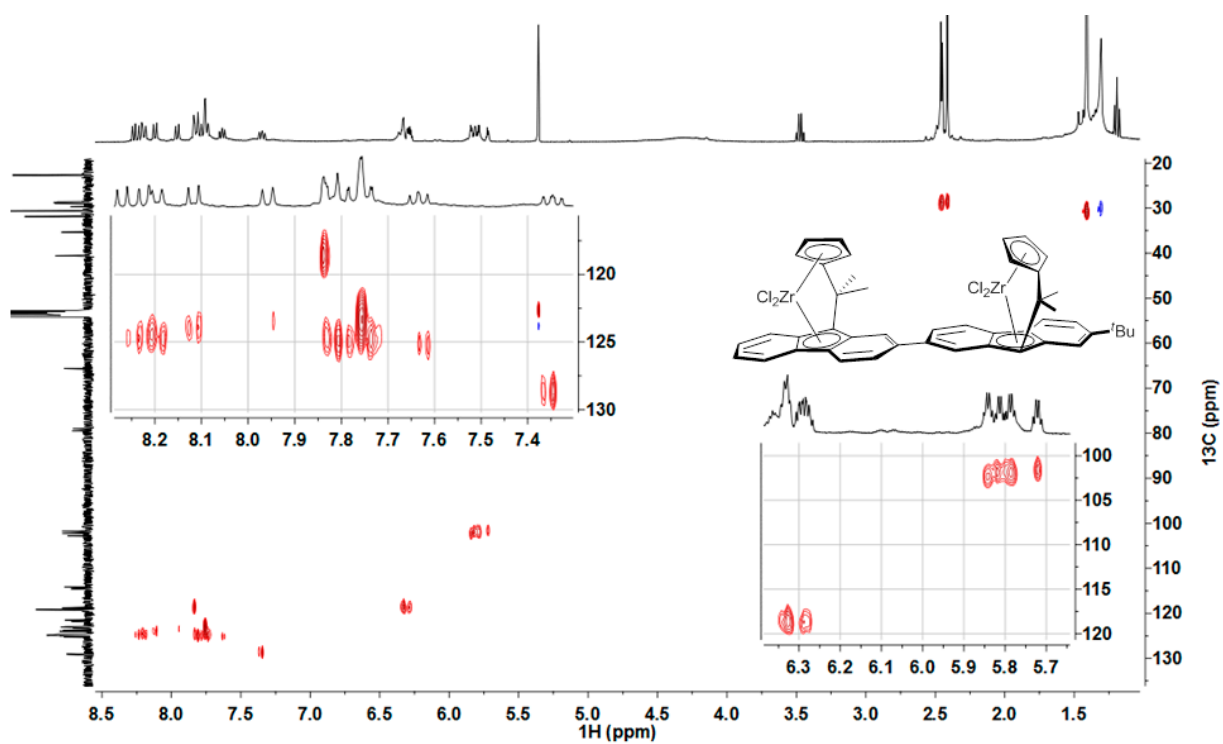

**Figure S17:**  $^1\text{H}$ - $^{13}\text{C}$  HSQC NMR spectrum ( $\text{CD}_2\text{Cl}_2$ , 400 MHz, 25 °C) of **9**

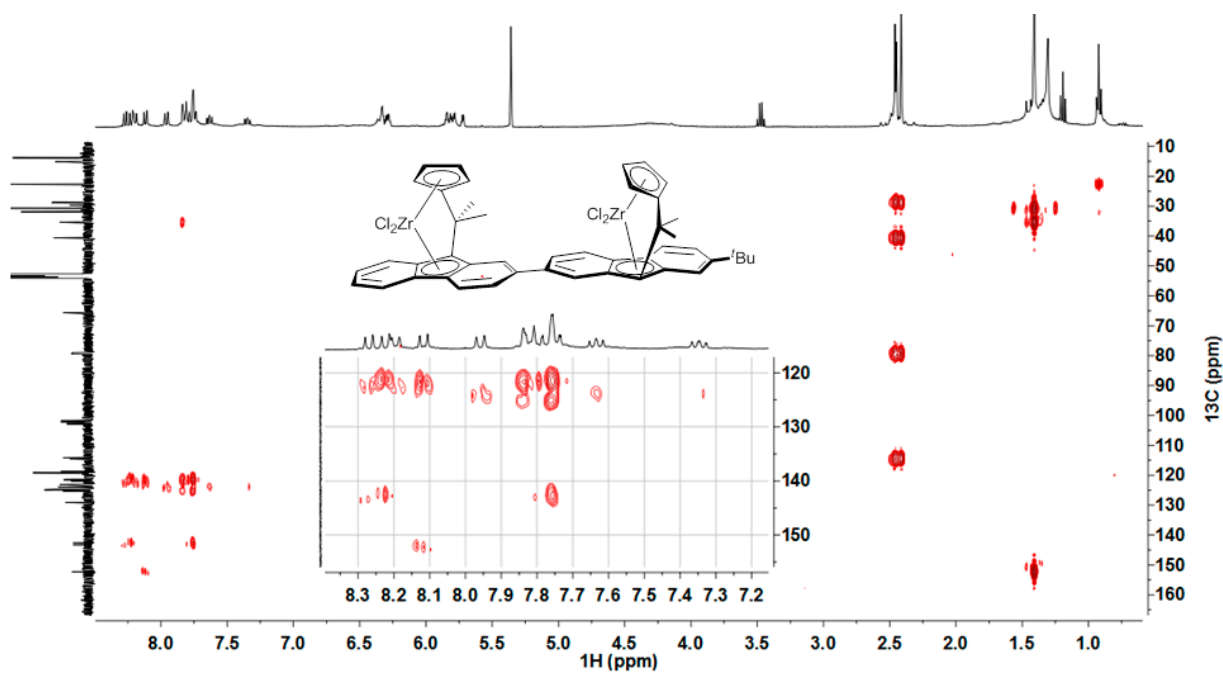

**Figure S18:**  $^1\text{H}$ - $^{13}\text{C}$  HMBC NMR spectrum ( $\text{CD}_2\text{Cl}_2$ , 400 MHz, 25 °C) of **9**

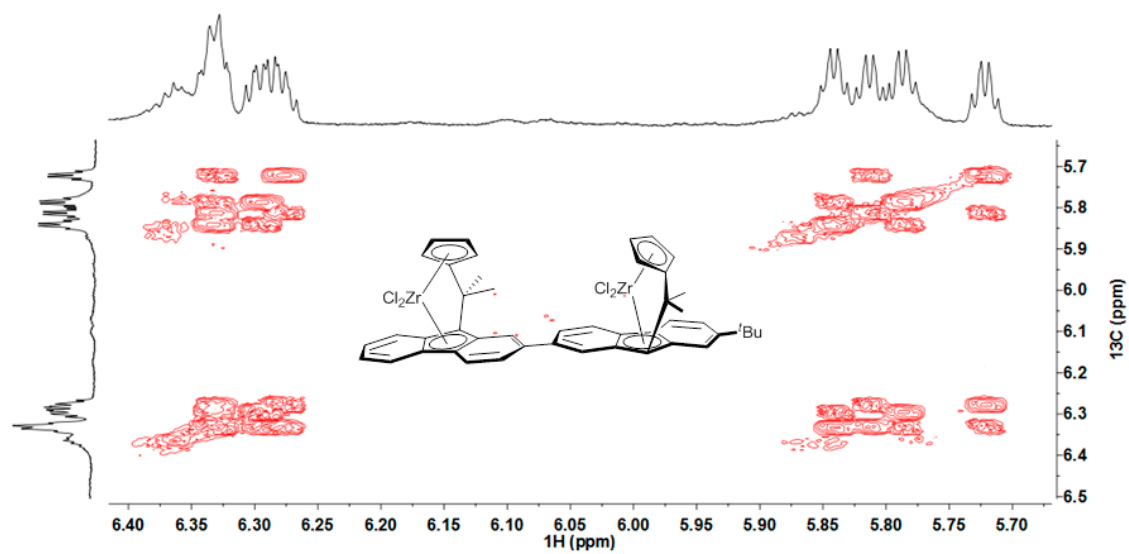

**Figure S19:** Detail (5.65–6.45 ppm) of the  $^1\text{H}$ - $^1\text{H}$  COSY NMR spectrum ( $\text{CD}_2\text{Cl}_2$ , 400 MHz, 25 °C) of **9**

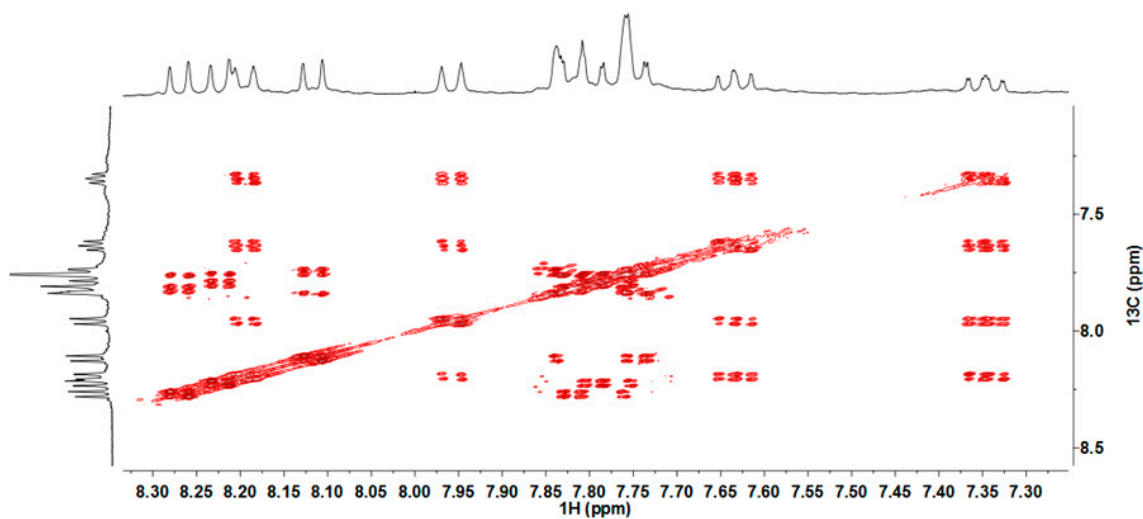

**Figure S20:** Detail (7.25–8.35 ppm) of the  $^1\text{H}$ - $^1\text{H}$  COSY NMR spectrum ( $\text{CD}_2\text{Cl}_2$ , 400 MHz, 25 °C) of **9**

# Centre régional de mesures physiques de l'Ouest (CRMPO) - RAPPORT D'ANALYSE

## Analysis Info

Analysis Name D:\Data\CRMPO\ASAP\_7816\_MS\_02.d  
Method ASAP\_CRMPO\_tune\_mid.m  
Sample Name LJ 294  
Comment L. JENDE LJ 294 Température : 300°C

Acquisition Date 02/02/2018 8:14:41 PM

Operator Philippe JÉHAN  
Instrument maXis

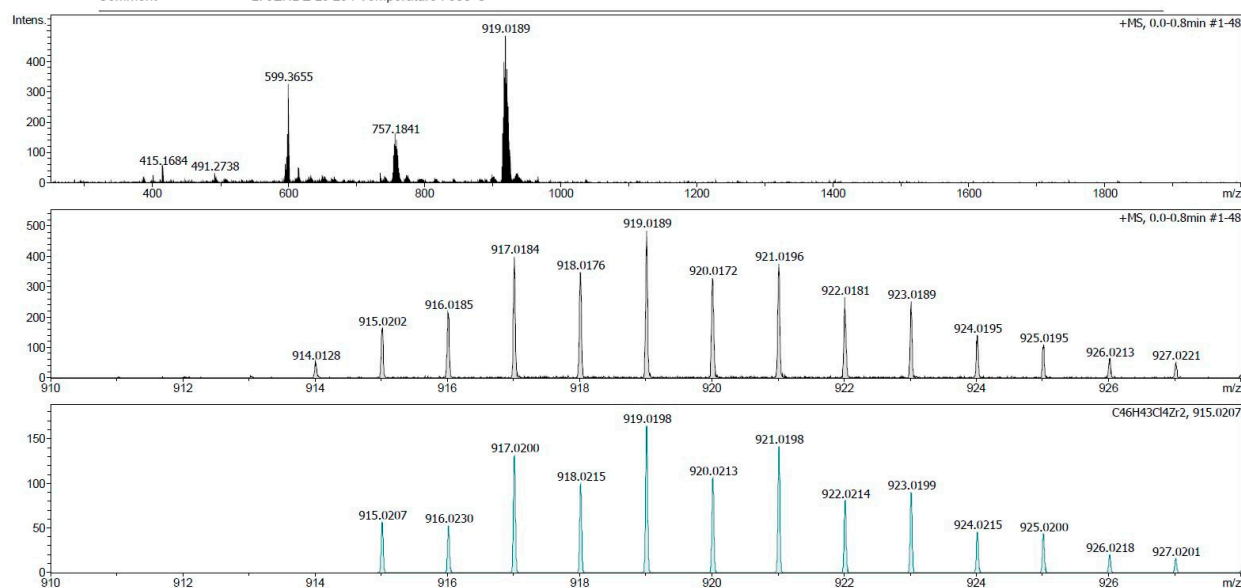

Figure S21: ASAP mass spectrum (300 °C) of 9

# Centre régional de mesures physiques de l'Ouest (CRMPO) - RAPPORT D'ANALYSE

L. JENDE LJ 294

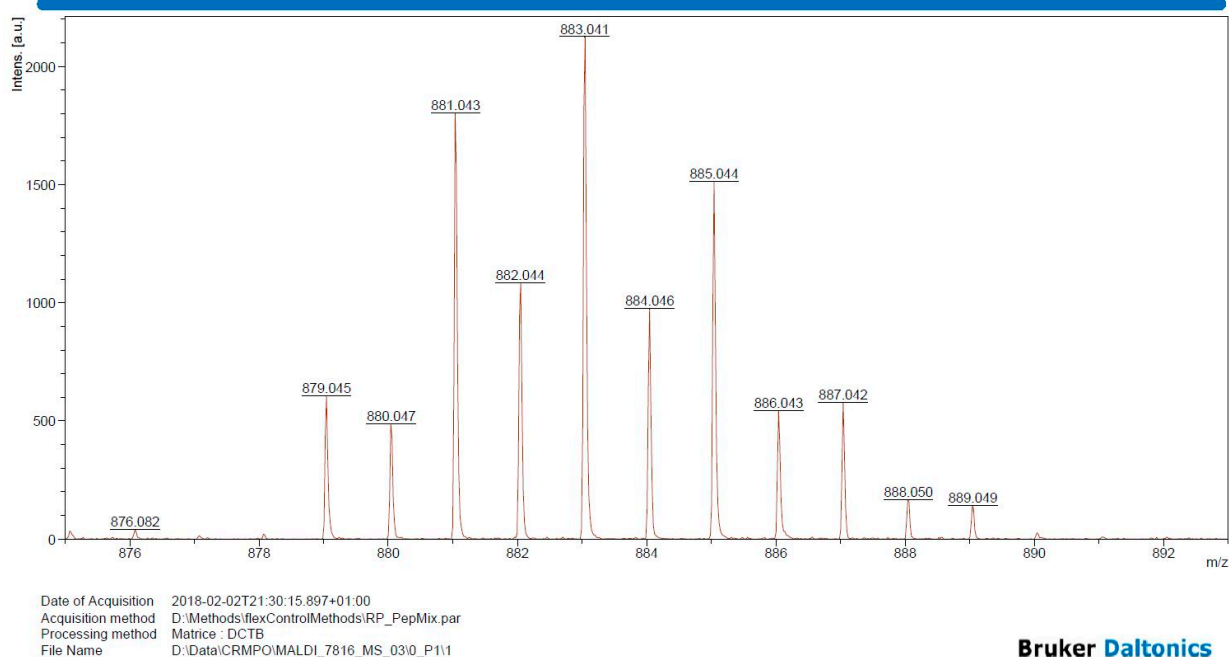

Date of Acquisition 2018-02-02T21:30:15.897+01:00  
Acquisition method D:\Methods\flexControlMethods\RP\_PepMix.par  
Processing method Matrice : DCTB  
File Name D:\Data\CRMPO\MALDI\_7816\_MS\_03\0\_P1\1

**Bruker Daltonics**

Figure S29: MALDI-TOF mass spectrum (DCTB-Matrix) of 9



**Table S1:** Crystallographic Data for Compounds **5**, **6**, and **7**

|                                                  | <b>5</b>                                        | <b>6</b>                                        | <b>7</b>                        |
|--------------------------------------------------|-------------------------------------------------|-------------------------------------------------|---------------------------------|
| Empirical formula                                | C <sub>36</sub> H <sub>42</sub> Si <sub>2</sub> | C <sub>44</sub> H <sub>52</sub> Si <sub>2</sub> | C <sub>38</sub> H <sub>36</sub> |
| CCDC                                             | 2268879                                         | 2268880                                         | 2268881                         |
| M <sub>w</sub> [g mol <sup>-1</sup> ]            | 530.87                                          | 637.03                                          | 492.67                          |
| T [K]                                            | 150                                             | 150                                             | 150                             |
| Crystal system                                   | triclinic                                       | triclinic                                       | monoclinic                      |
| Space group                                      | <i>P</i> -1                                     | <i>P</i> 2 <sub>-1</sub>                        | <i>P</i> 2 <sub>1</sub> /c      |
| a [Å]                                            | 10.7951(11)                                     | 9.7922(10)                                      | 18.2840(13)                     |
| b [Å]                                            | 12.1001(12)                                     | 13.3896(11)                                     | 6.5769(4)                       |
| c [Å]                                            | 13.5758(12)                                     | 15.6000(15)                                     | 22.8564(16)                     |
| α [°]                                            | 68.871(3)                                       | 70.243(3)                                       | 90.00                           |
| β [°]                                            | 82.082(3)                                       | 86.464(4)                                       | 97.671(3)                       |
| γ [°]                                            | 68.240(3)                                       | 79.205(3)                                       | 90.00                           |
| Volume [Å <sup>3</sup> ]                         | 1536.2(3)                                       | 1890.9(3)                                       | 4878.7(12)                      |
| Z                                                | 2                                               | 2                                               | 4                               |
| density (calculated)<br>ρ [mg mm <sup>-3</sup> ] | 1.148                                           | 1.119                                           | 1.249                           |
| Absorption coefficient<br>μ [mm <sup>-1</sup> ]  | 0.138                                           | 0.123                                           | 0.067                           |
| R1 (obs) <sup>[a]</sup>                          | 0.0406                                          | 0.0443                                          | 0.0661                          |
| wR2 (all) <sup>[b]</sup>                         | 0.1124                                          | 0.1228                                          | 0.1622                          |

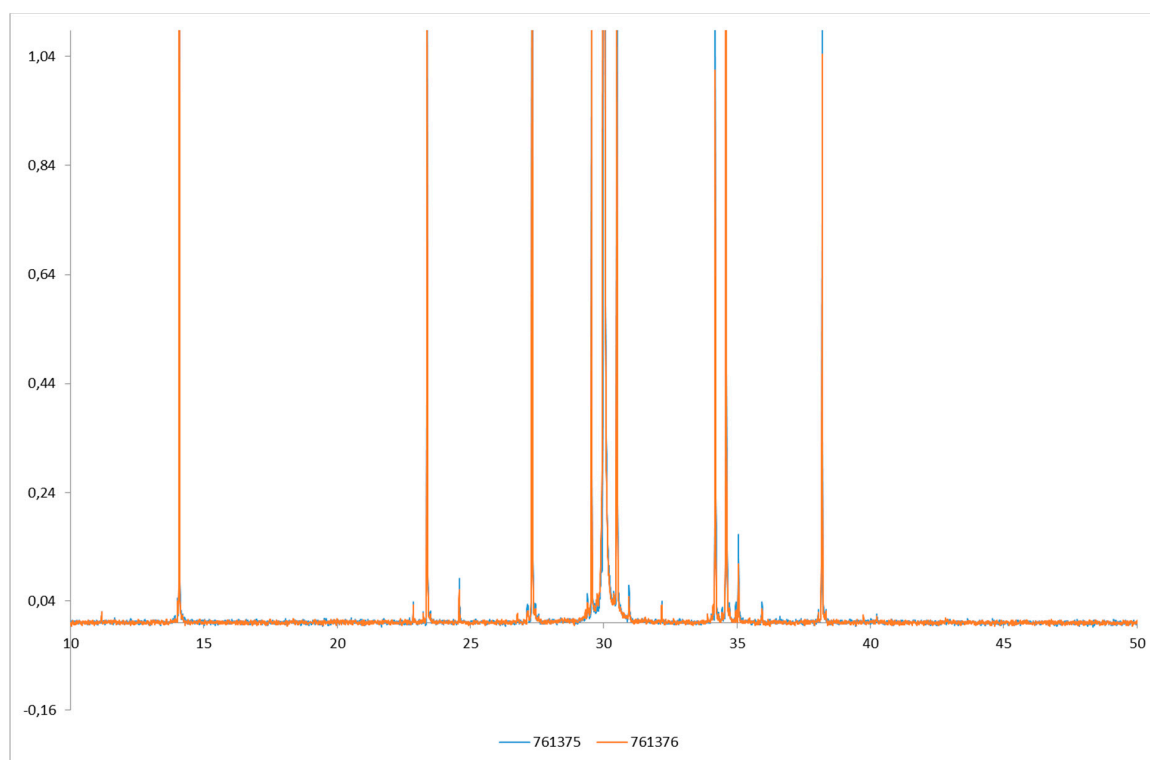

|                   | CPO-CPR-18-0045           | CPO-CPR-18-0045           |
|-------------------|---------------------------|---------------------------|
|                   | 761375                    | 761376                    |
|                   | PE : Experimental Product | PE : Experimental Product |
|                   | CP1                       | CP2                       |
| C3 (m%)           | 0,0                       | 0,0                       |
| C4 (m%)           | 0,1                       | 0,1                       |
| C6 (m%)           | 4,7                       | 3,9                       |
| C3 (w%)           | 0,0                       | 0,0                       |
| C4 (w%)           | 0,1                       | 0,1                       |
| C6 (w%)           | 12,8                      | 10,8                      |
| Methyl br./1000C  | 0,0                       | 0,0                       |
| Ethyl br. /1000C  | 0,4                       | 0,3                       |
| Butyl br./1000C   | 21,7                      | 18,3                      |
| Vinylidene /1000C | 0                         | 0                         |
| Vin ends/10000C   | 2                         | 2                         |
| Sat ends/10000C   | 5                         | 6                         |

**Figure S30:**  $^{13}\text{C}\{^1\text{H}\}$  NMR spectra (1,2,5-trichlorobenzene/ $\text{C}_6\text{D}_6$ , 125 MHz, 135 °C) of ethylene/1-hexene copolymers prepared with complex **9** and corresponding composition determined thereof (Table 3, entries **13** and **14**).

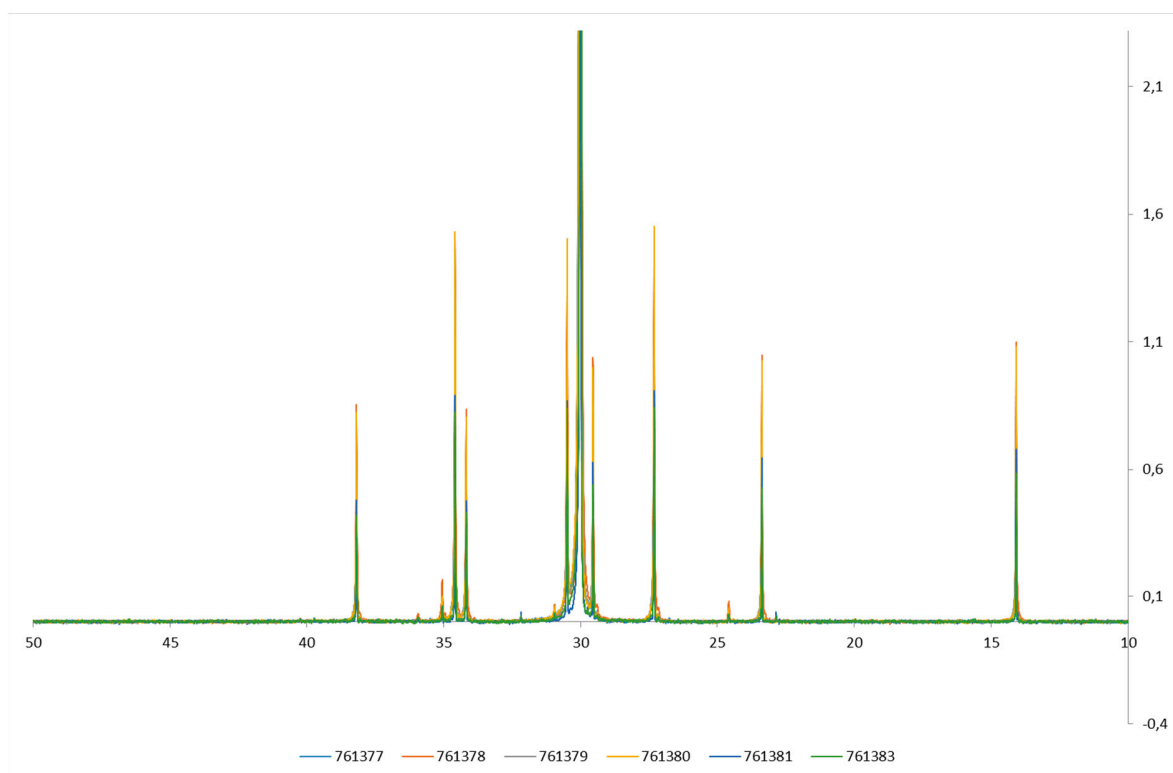

|                   |  |  | CPO-CPR-18-0045<br>761377        | CPO-CPR-18-0045<br>761378        | CPO-CPR-18-0045<br>761379        |
|-------------------|--|--|----------------------------------|----------------------------------|----------------------------------|
|                   |  |  | PE : Experimental Product<br>CP3 | PE : Experimental Product<br>CP4 | PE : Experimental Product<br>CP5 |
| Hexene (mole%)    |  |  | 4,3                              | 6,8                              | 4,7                              |
| Ethylene (mole%)  |  |  | 95,7                             | 93,2                             | 95,3                             |
| Hexene (wt%)      |  |  | 11,9                             | 17,9                             | 12,9                             |
| Ethylene (wt%)    |  |  | 88,1                             | 82,1                             | 87,1                             |
| Butyl/1000C       |  |  | 19,8                             | 29,6                             | 21,4                             |
| Sat. Ends /10000C |  |  | 5,2                              | 9,0                              | 4,3                              |
| Vin. Ends/10000C  |  |  | 0,0                              | 0,0                              | 0,0                              |

**Figure S31:**  $^{13}\text{C}\{^1\text{H}\}$  NMR spectra (1,2,5-trichlorobenzene/ $\text{C}_6\text{D}_6$ , 125 MHz, 135 °C) of ethylene/1-hexene copolymers prepared with complexes **9** and **M**, and corresponding composition determined thereof (Table 3, entries 15–17).

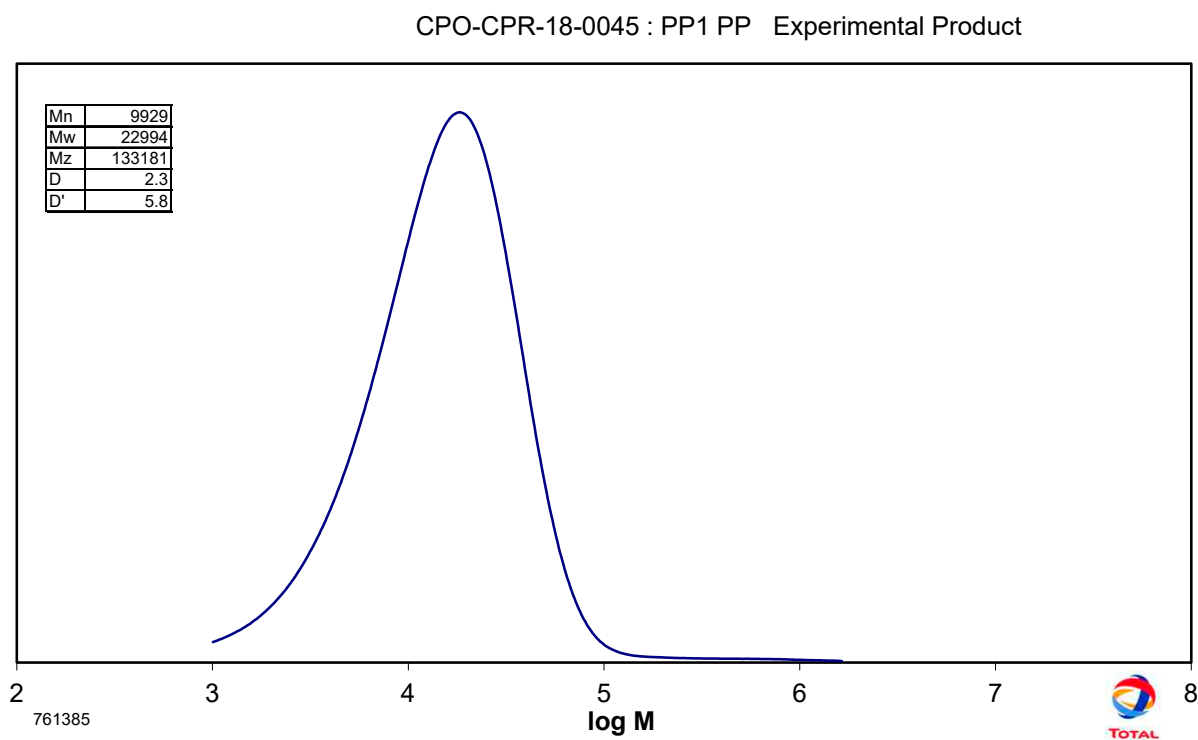

**Figure S32:** SEC trace of a PP prepared with complex **9** (Table 2, entry **7**).

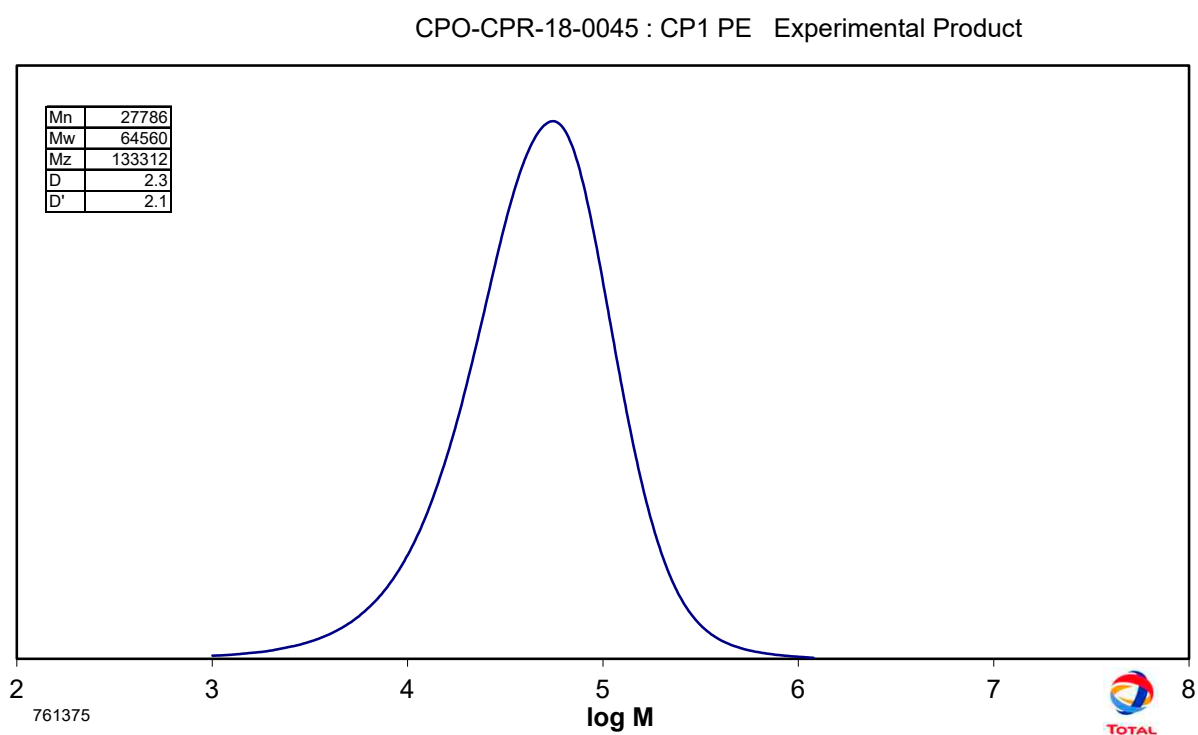

**Figure S33:** SEC trace of a poly(ethylene-*co*-1-hexene) prepared with complex **9** (Table 3, entry **13**).

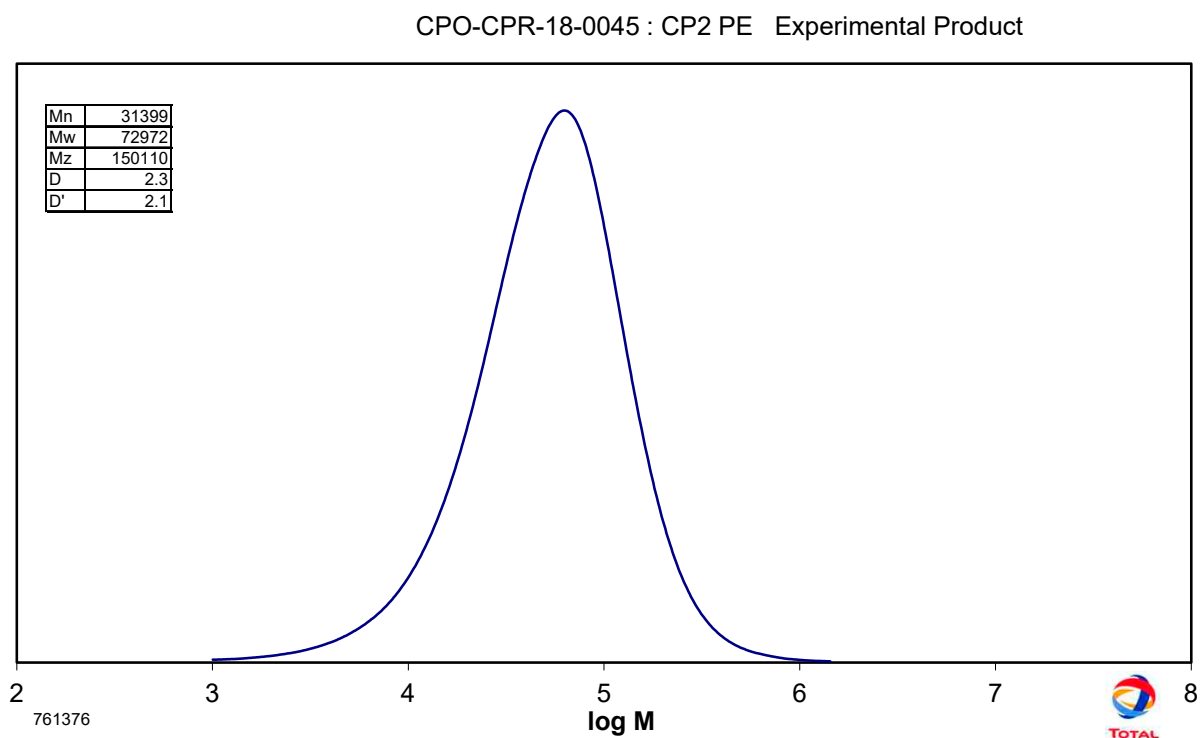

**Figure S34:** SEC trace of a poly(ethylene-*co*-1-hexene) prepared with complex **9** (Table 3, entry **14**).

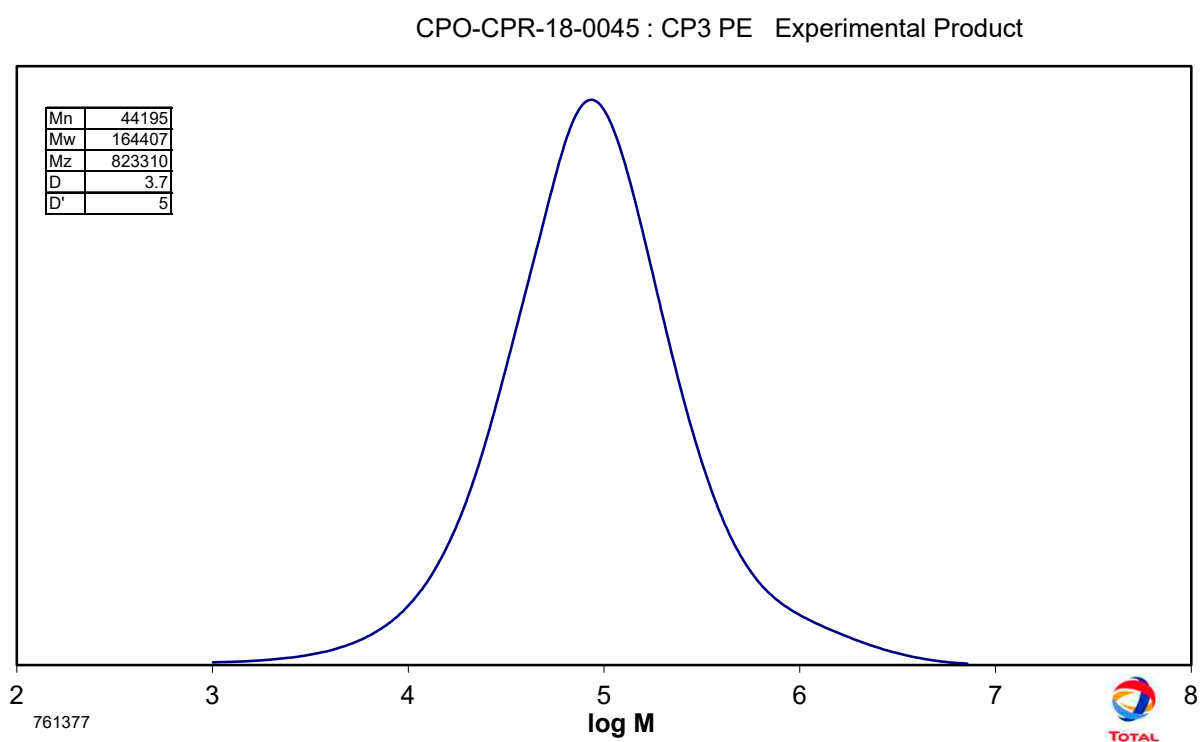

**Figure S35:** SEC trace of a poly(ethylene-*co*-1-hexene) prepared with complex **9** (Table 3, entry **15**).

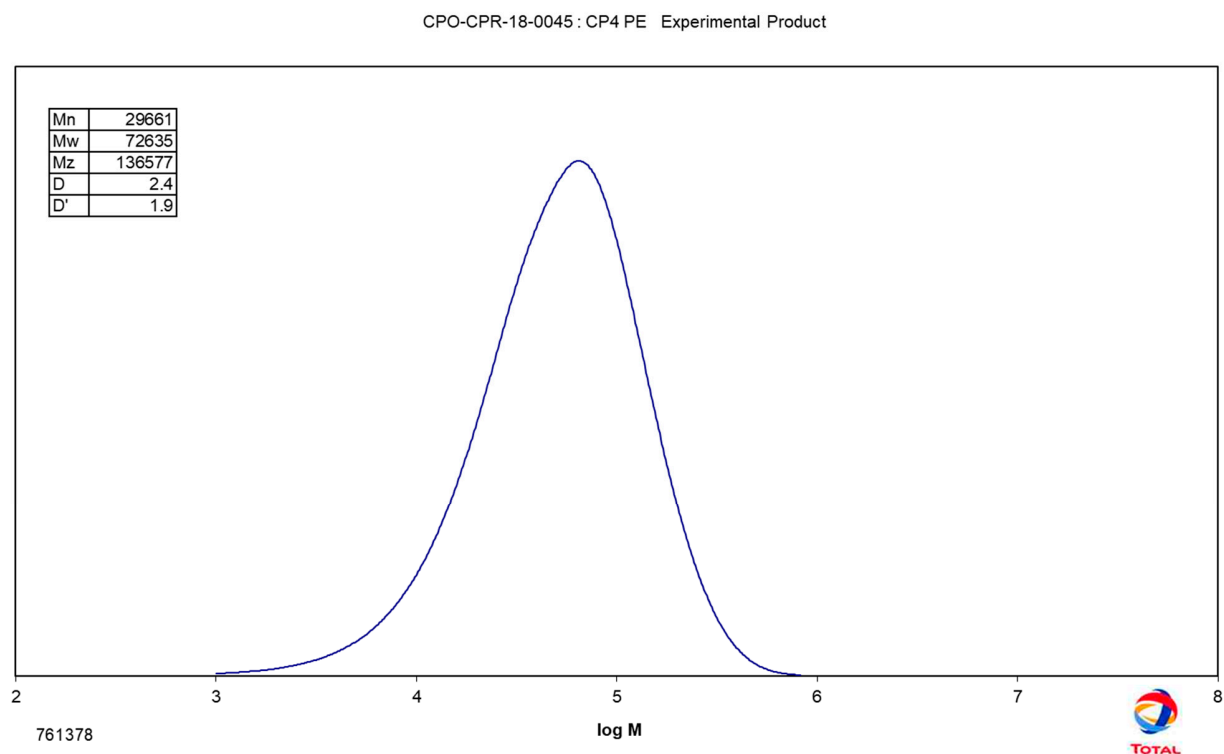

**Figure S36:** SEC trace of a poly(ethylene-*co*-1-hexene) prepared with complex **M** (Table 3, entry **16**).

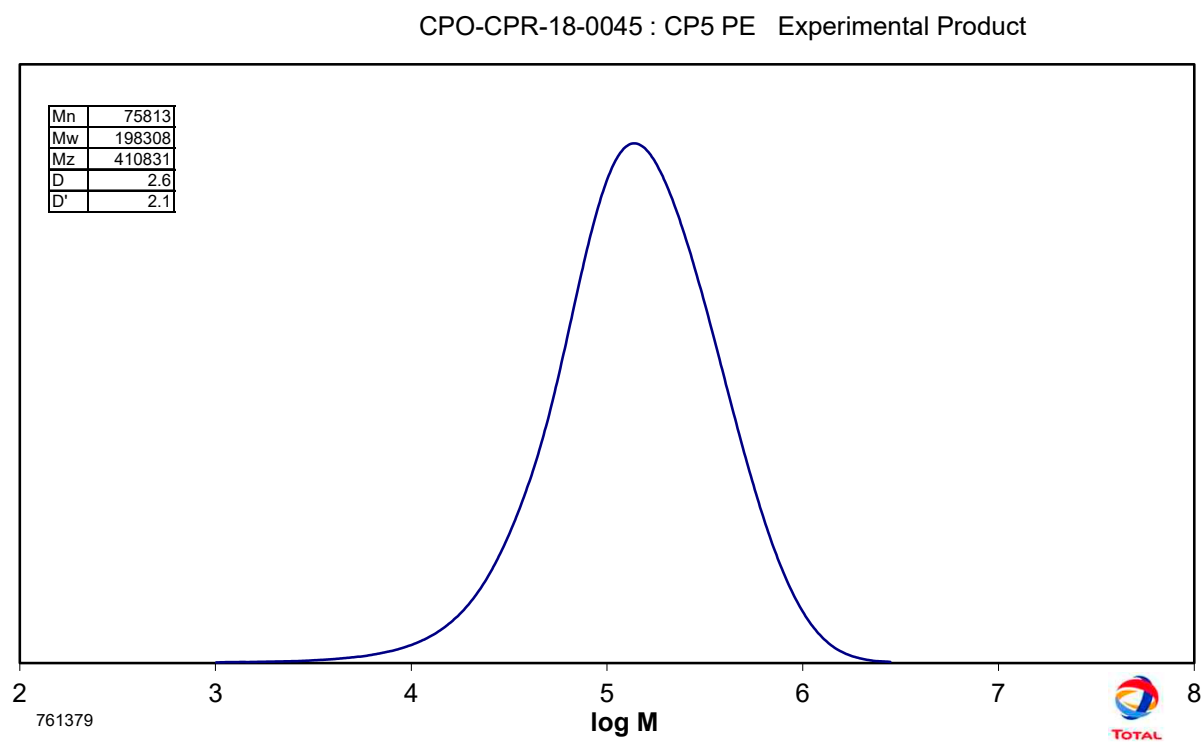

**Figure S37:** SEC trace of a poly(ethylene-*co*-1-hexene) prepared with complex **M** (Table 3, entry 17).

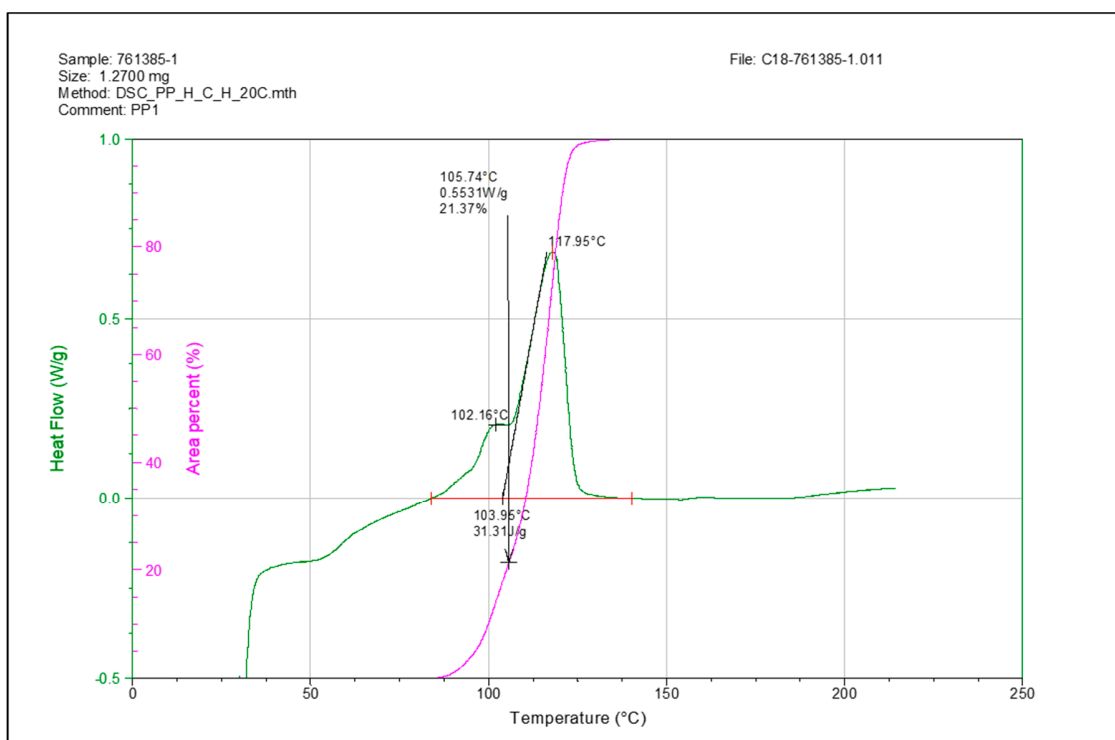

**Figure S38:** DSC trace of a polypropylene prepared with complex **9** (Table 2, entry **7**).

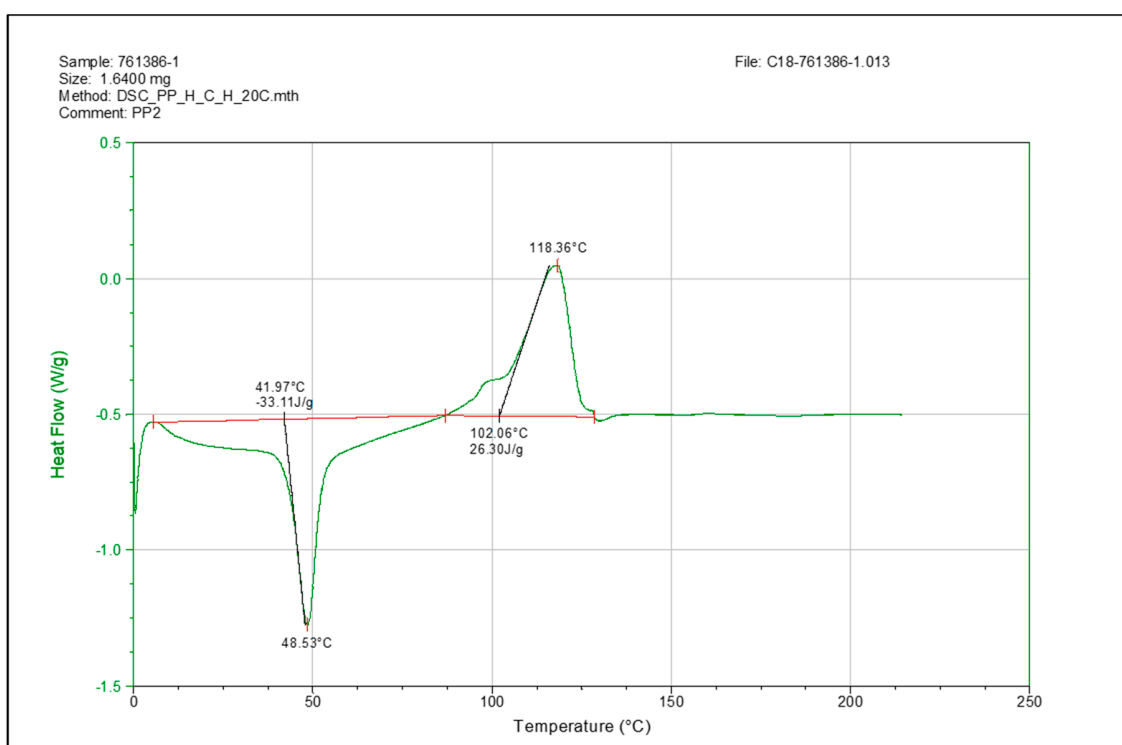

**Figure S39:** DSC trace of a polypropylene prepared with complex **9** (Table 2, entry **8**).



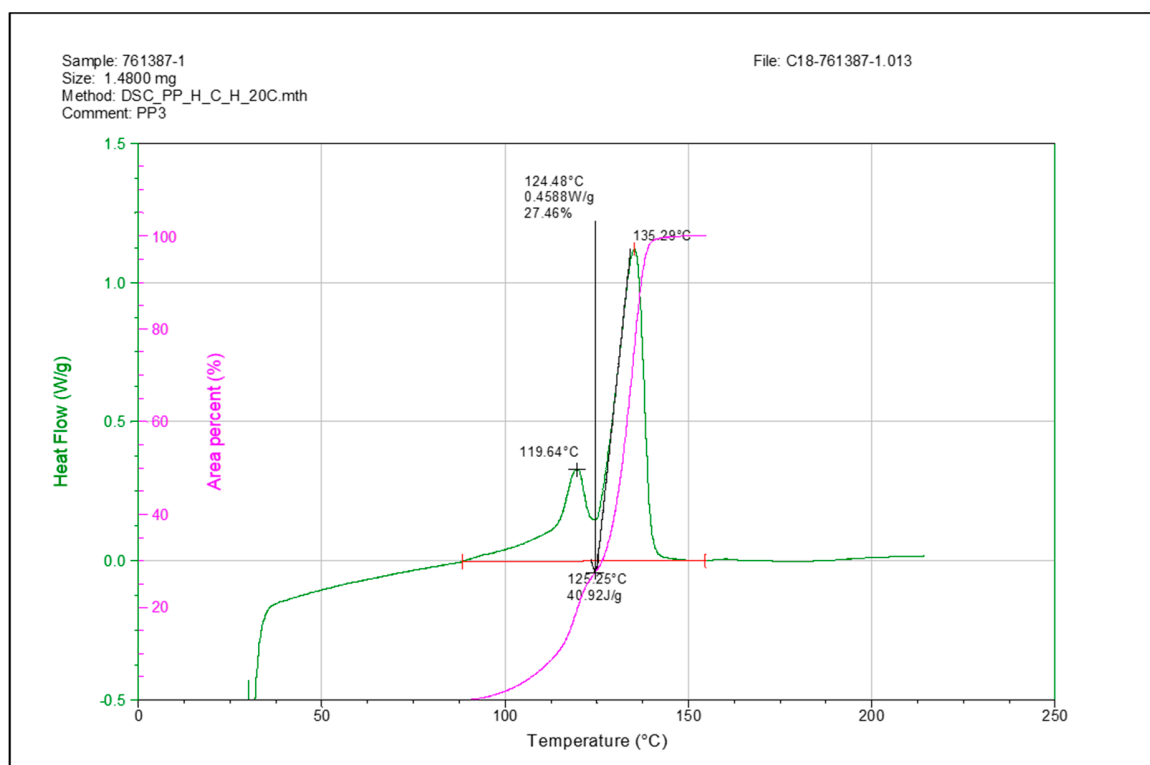

**Figure S40:** DSC trace of a polypropylene prepared with complex **9** (Table 2, entry **9**).

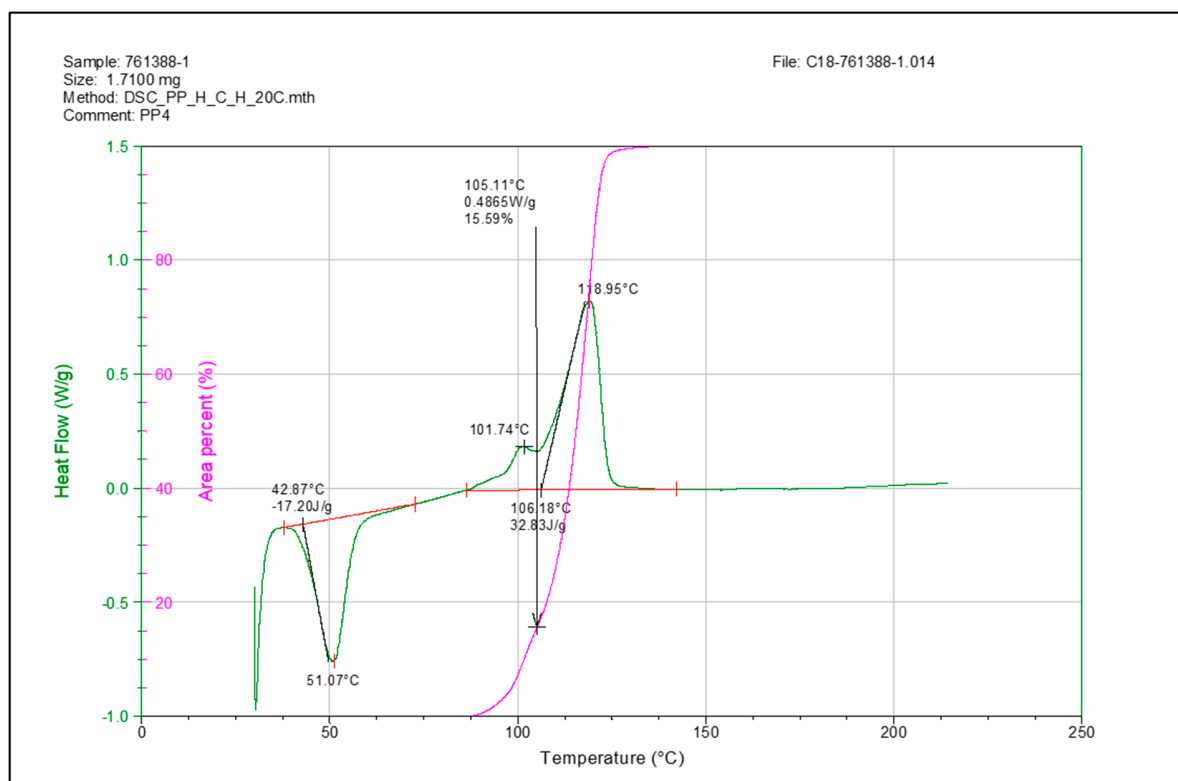

**Figure S41:** DSC trace of a polypropylene prepared with complex **M** (Table 2, entry **10**).

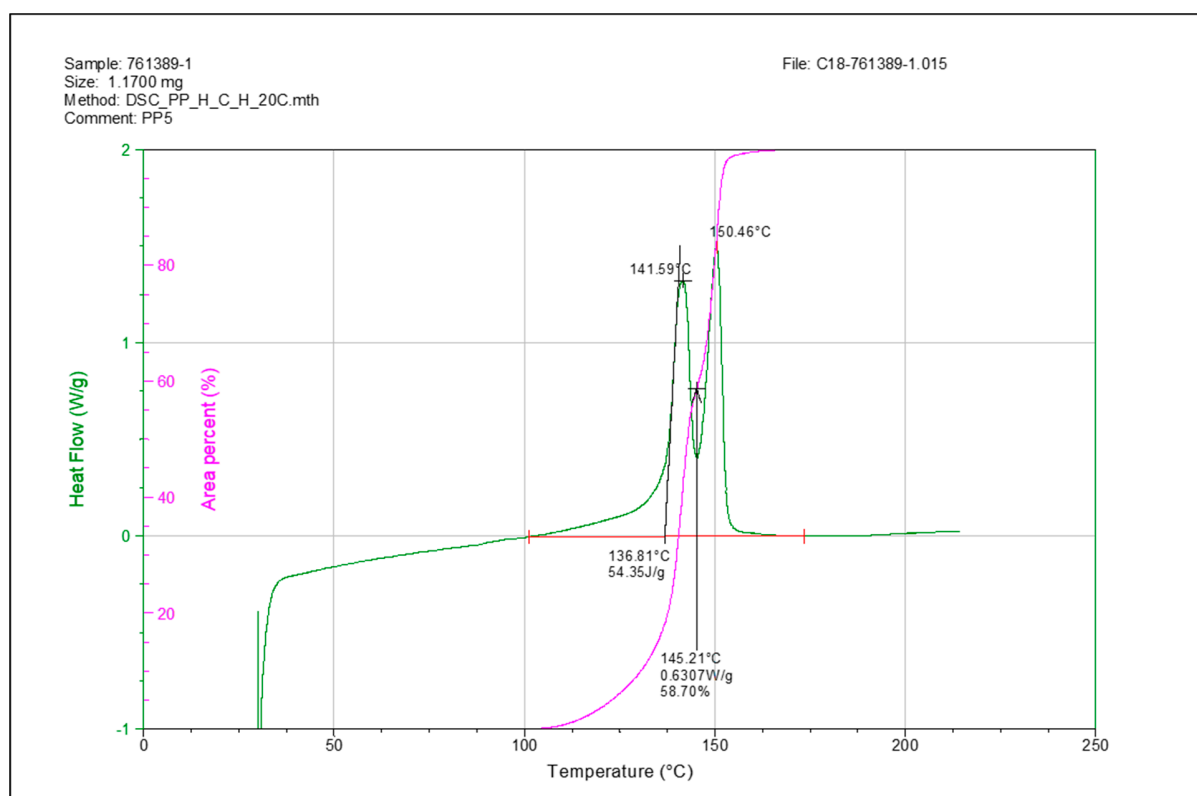

**Figure S42:** DSC trace of a polypropylene prepared with complex **M** (Table 2, entry 11).

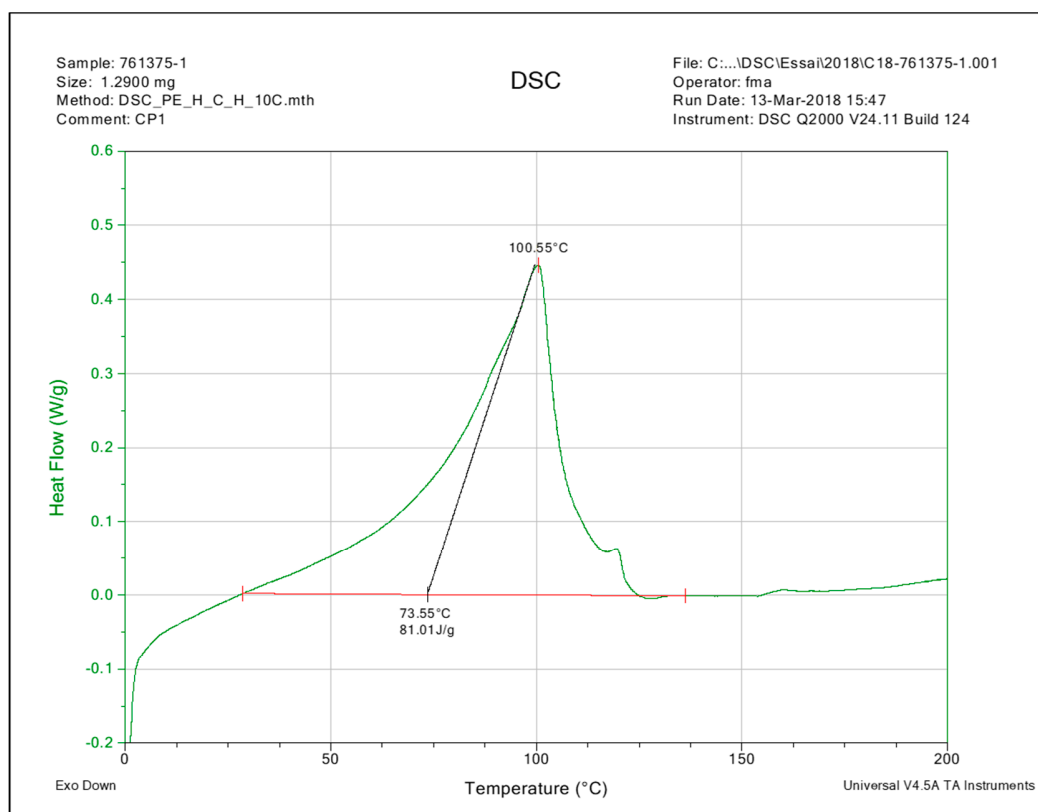

**Figure S43:** DSC trace of a poly(ethylene-*co*-1-hexene) prepared with complex **9** (Table 3, entry **13**).

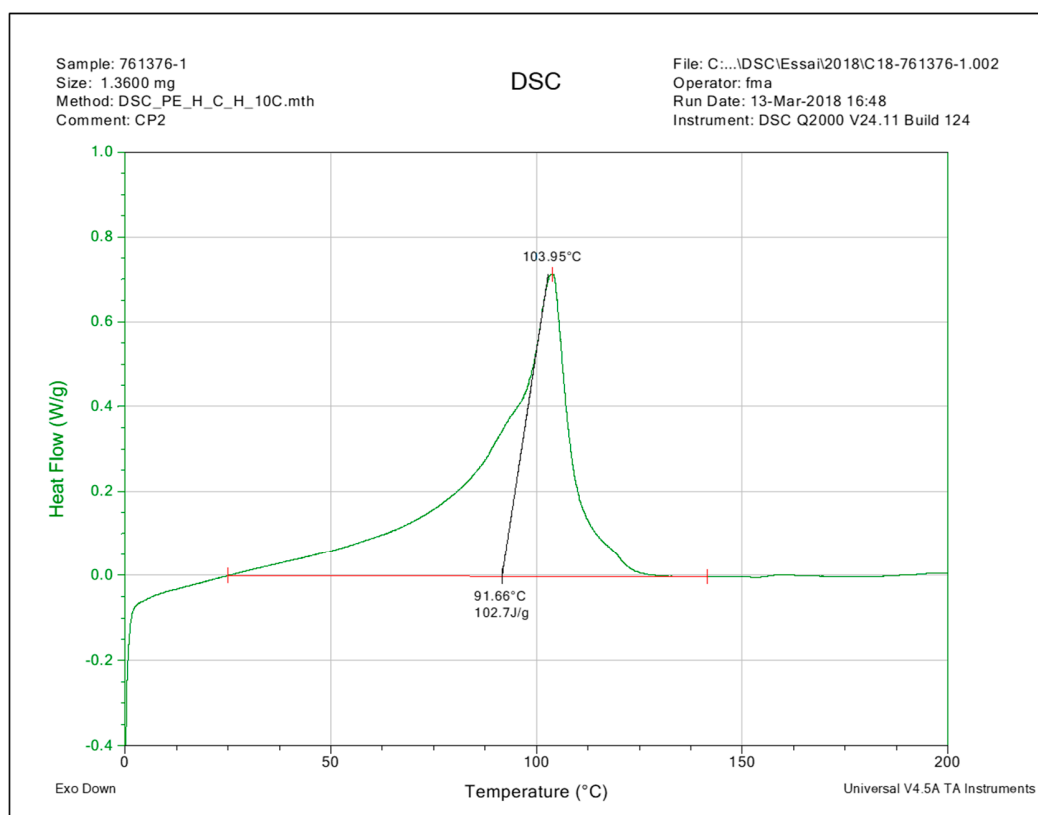

**Figure S44:** DSC trace of a poly(ethylene-*co*-1-hexene) prepared with complex **9** (Table 3, entry **14**).

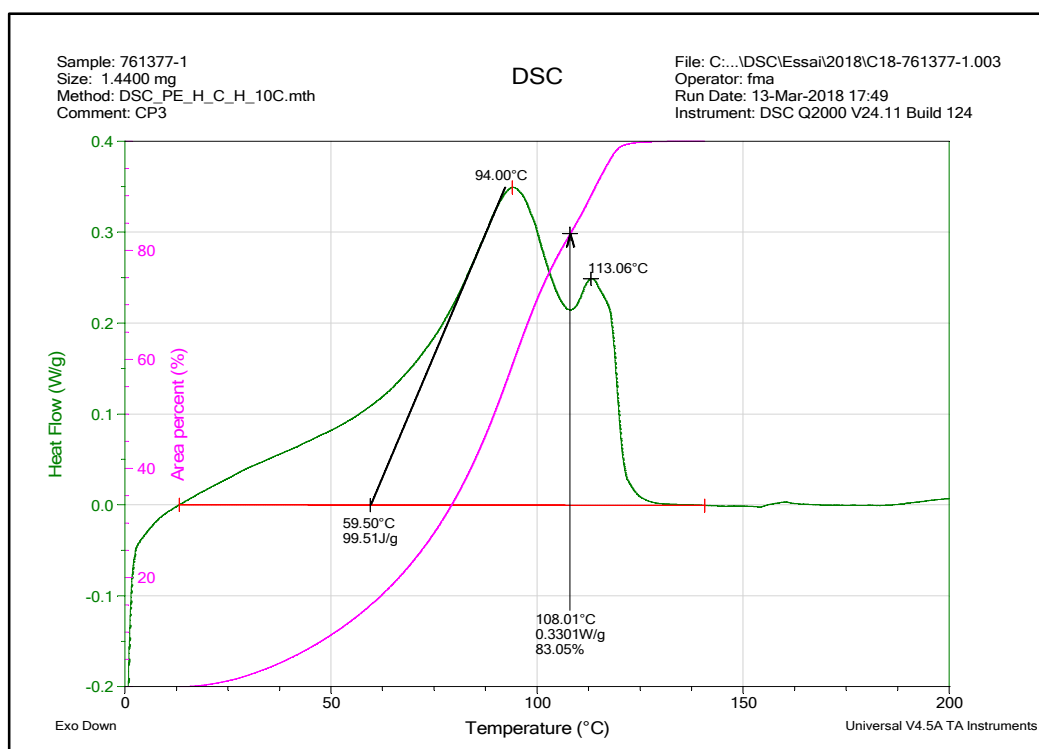

**Figure S45:** DSC trace of a poly(ethylene-*co*-1-hexene) prepared with complex **9** (Table 3, entry **15**).

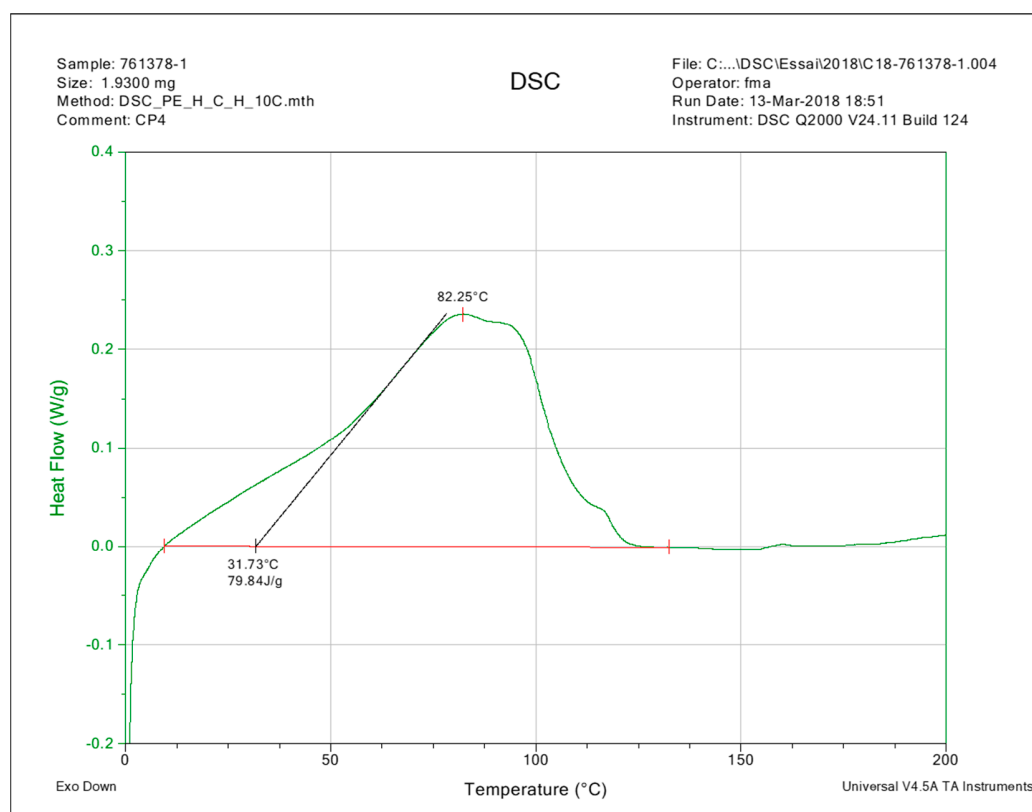

**Figure S46:** DSC trace of a poly(ethylene-*co*-1-hexene) prepared with complex **M** (Table 3, entry **16**).

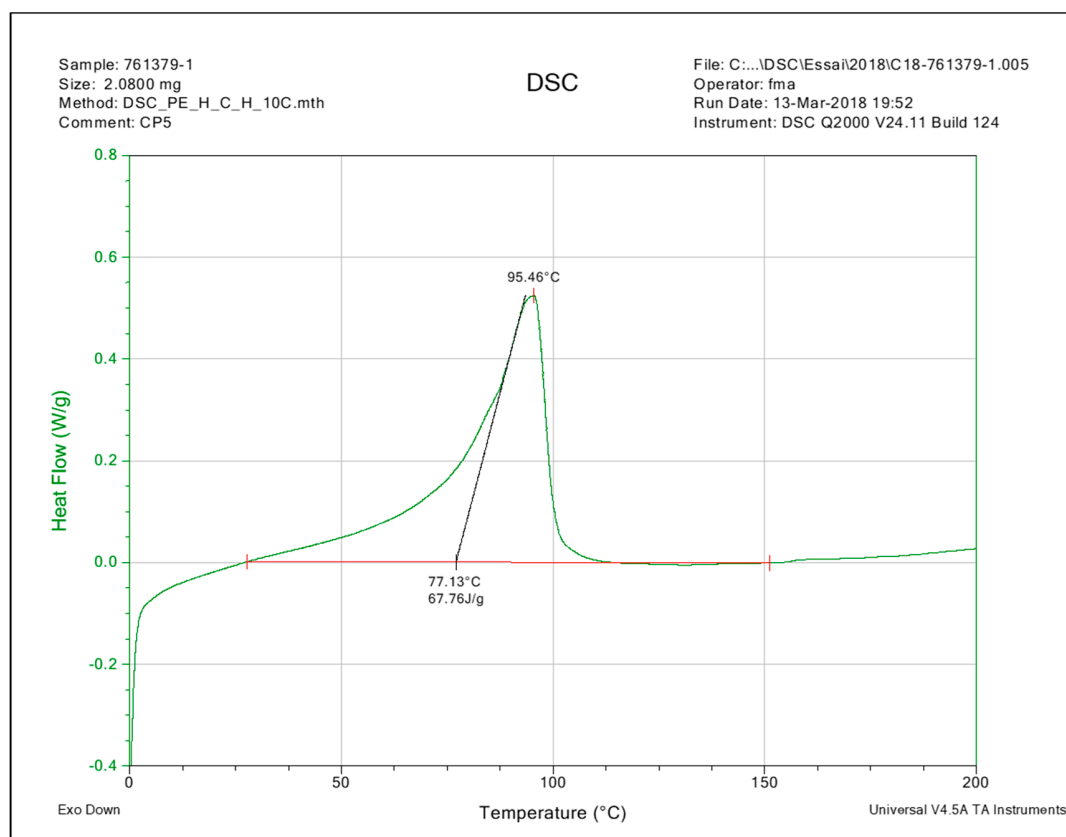

**Figure S47:** DSC trace of a poly(ethylene-*co*-1-hexene) prepared with complex **M** (Table 3, entry 17).
